# Supplementary material for: The adaptive community-response (ACR) method for collecting misinformation on social media
Source: Springer Nature journal article supplement (doi:10.1186/s40537-024-00894-w), 2024-02-24
Supplement: 40537_2024_894_MOESM4_ESM.pdf [file 40537_2024_894_MOESM4_ESM.pdf]

# Additional file 4

## The adaptive community-response (ACR) method for collecting misinformation on social media

Julian Kauk<sup>1</sup>, Helene Kreysa<sup>1</sup>, André Scherag<sup>2, 3</sup>, and Stefan R. Schweinberger<sup>1, 3, 4</sup>

<sup>1</sup>*Department of General Psychology and Cognitive Neuroscience, Friedrich Schiller University Jena, Jena, Germany*

<sup>2</sup>*Institute of Medical Statistics, Computer and Data Sciences, Jena University Hospital, Jena, Germany*

<sup>3</sup>*Michael Stifel Center Jena, Jena, Germany*

<sup>4</sup>*German Center for Mental Health (DZPG), Site Jena-Magdeburg-Halle, Germany*

August 29, 2023

### Outputs of the LMEM

In the present document, we present the outputs of the LMEM for mean text similarity and mean sentiment score, as provided by the STATSMODEL package. We also report the AIC and BIC of the models, and AIC and BIC differences between the nested models.

Output 1: Fixed effects model for the mean text similarity. The AIC and BIC of this model are  $-2364.94$  and  $-2328.96$ , respectively.

```

Mixed Linear Model Regression Results
=====
Model:                MixedLM                Dependent Variable:    value
No. Observations:    1261                Method:                ML
No. Groups:          348                Scale:                0.0051
Min. group size:     1                Log-Likelihood:       1189.4702
Max. group size:     5                Converged:            Yes
Mean group size:     3.6
=====
                                Coef.  Std.Err.  z    P>|z| [0.025 0.975]
-----+-----+-----+-----+-----+-----+-----
Intercept                    0.470    0.006  72.646  0.000   0.458  0.483
C(t, levels=['s', 'b1', 'b2', 'b3', 'b4'])[T.b1] -0.096    0.006 -14.940  0.000  -0.109 -0.084
C(t, levels=['s', 'b1', 'b2', 'b3', 'b4'])[T.b2] -0.112    0.006 -18.729  0.000  -0.124 -0.100
C(t, levels=['s', 'b1', 'b2', 'b3', 'b4'])[T.b3] -0.097    0.006 -16.860  0.000  -0.108 -0.085
C(t, levels=['s', 'b1', 'b2', 'b3', 'b4'])[T.b4] -0.088    0.008 -10.952  0.000  -0.104 -0.072
Group Var                     0.009    0.014
=====

```

Output 2: Random effects model for the mean text similarity. The AIC and BIC of this model are  $-2502.46$  and  $-2394.53$ , respectively. The AIC and BIC differences of the fixed and the random models are  $137.52$  and  $65.57$ , respectively.

Mixed Linear Model Regression Results

| Model:            |  | MixedLM | Dependent Variable: |  | value     |
|-------------------|--|---------|---------------------|--|-----------|
| No. Observations: |  | 1261    | Method:             |  | ML        |
| No. Groups:       |  | 348     | Scale:              |  | 0.0019    |
| Min. group size:  |  | 1       | Log-Likelihood:     |  | 1272.2322 |
| Max. group size:  |  | 5       | Converged:          |  | Yes       |
| Mean group size:  |  | 3.6     |                     |  |           |

  

|                                                                                                           | Coef.  | Std.Err. | z       | P> z  | [0.025 | 0.975] |
|-----------------------------------------------------------------------------------------------------------|--------|----------|---------|-------|--------|--------|
| Intercept                                                                                                 | 0.470  | 0.007    | 66.130  | 0.000 | 0.456  | 0.484  |
| C(t, levels=['s', 'b1', 'b2', 'b3', 'b4']) [T.b1]                                                         | -0.099 | 0.007    | -13.326 | 0.000 | -0.113 | -0.084 |
| C(t, levels=['s', 'b1', 'b2', 'b3', 'b4']) [T.b2]                                                         | -0.115 | 0.007    | -16.538 | 0.000 | -0.128 | -0.101 |
| C(t, levels=['s', 'b1', 'b2', 'b3', 'b4']) [T.b3]                                                         | -0.099 | 0.007    | -15.059 | 0.000 | -0.111 | -0.086 |
| C(t, levels=['s', 'b1', 'b2', 'b3', 'b4']) [T.b4]                                                         | -0.088 | 0.008    | -11.486 | 0.000 | -0.103 | -0.073 |
| Group Var                                                                                                 |        |          |         |       | 0.016  |        |
| Group x C(t, levels=['s', 'b1', 'b2', 'b3', 'b4']) [T.b1] Cov                                             |        |          |         |       | -0.007 |        |
| C(t, levels=['s', 'b1', 'b2', 'b3', 'b4']) [T.b1] Var                                                     |        |          |         |       | 0.011  |        |
| Group x C(t, levels=['s', 'b1', 'b2', 'b3', 'b4']) [T.b2] Cov                                             |        |          |         |       | -0.007 |        |
| C(t, levels=['s', 'b1', 'b2', 'b3', 'b4']) [T.b1] x C(t, levels=['s', 'b1', 'b2', 'b3', 'b4']) [T.b2] Cov |        |          |         |       | 0.010  |        |
| C(t, levels=['s', 'b1', 'b2', 'b3', 'b4']) [T.b2] Var                                                     |        |          |         |       | 0.011  |        |
| Group x C(t, levels=['s', 'b1', 'b2', 'b3', 'b4']) [T.b3] Cov                                             |        |          |         |       | -0.007 |        |
| C(t, levels=['s', 'b1', 'b2', 'b3', 'b4']) [T.b1] x C(t, levels=['s', 'b1', 'b2', 'b3', 'b4']) [T.b3] Cov |        |          |         |       | 0.008  |        |
| C(t, levels=['s', 'b1', 'b2', 'b3', 'b4']) [T.b2] x C(t, levels=['s', 'b1', 'b2', 'b3', 'b4']) [T.b3] Cov |        |          |         |       | 0.010  |        |
| C(t, levels=['s', 'b1', 'b2', 'b3', 'b4']) [T.b3] Var                                                     |        |          |         |       | 0.010  |        |
| Group x C(t, levels=['s', 'b1', 'b2', 'b3', 'b4']) [T.b4] Cov                                             |        |          |         |       | -0.008 |        |
| C(t, levels=['s', 'b1', 'b2', 'b3', 'b4']) [T.b1] x C(t, levels=['s', 'b1', 'b2', 'b3', 'b4']) [T.b4] Cov |        |          |         |       | 0.007  |        |
| C(t, levels=['s', 'b1', 'b2', 'b3', 'b4']) [T.b2] x C(t, levels=['s', 'b1', 'b2', 'b3', 'b4']) [T.b4] Cov |        |          |         |       | 0.007  |        |
| C(t, levels=['s', 'b1', 'b2', 'b3', 'b4']) [T.b3] x C(t, levels=['s', 'b1', 'b2', 'b3', 'b4']) [T.b4] Cov |        |          |         |       | 0.006  |        |
| C(t, levels=['s', 'b1', 'b2', 'b3', 'b4']) [T.b4] Var                                                     |        |          |         |       | 0.007  |        |

Output 3: Fixed effects model for the mean sentiment score. The AIC and BIC of this model are  $-1568.06$  and  $-1532.08$ , respectively.

```

Mixed Linear Model Regression Results
=====
Model:                MixedLM          Dependent Variable:    value
No. Observations:    1261              Method:                ML
No. Groups:          348                Scale:                 0.0106
Min. group size:     1                  Log-Likelihood:       791.0303
Max. group size:     5                  Converged:             Yes
Mean group size:     3.6
=====
                                Coef. Std.Err.  z    P>|z| [0.025 0.975]
-----+-----+-----+-----+-----+-----+-----+-----
Intercept                0.429   0.008  51.985  0.000  0.412  0.445
C(t, levels=['s', 'b1', 'b2', 'b3', 'b4'])[T.b1] -0.112  0.009 -12.157  0.000 -0.130 -0.094
C(t, levels=['s', 'b1', 'b2', 'b3', 'b4'])[T.b2] -0.097  0.009 -11.356  0.000 -0.114 -0.080
C(t, levels=['s', 'b1', 'b2', 'b3', 'b4'])[T.b3] -0.082  0.008 -10.022  0.000 -0.098 -0.066
C(t, levels=['s', 'b1', 'b2', 'b3', 'b4'])[T.b4] -0.043  0.011 -3.756  0.000 -0.066 -0.021
Group Var                 0.013   0.015
=====

```

Output 4: Random effects model for the mean sentiment score. The AIC and BIC of this model are  $-1598.72$  and  $-1490.79$ , respectively. The AIC and BIC differences of the fixed and the random models are  $30.66$  and  $-41.29$ , respectively.

Mixed Linear Model Regression Results

| Model:            |  | MixedLM | Dependent Variable: |  | value    |
|-------------------|--|---------|---------------------|--|----------|
| No. Observations: |  | 1261    | Method:             |  | ML       |
| No. Groups:       |  | 348     | Scale:              |  | 0.0062   |
| Min. group size:  |  | 1       | Log-Likelihood:     |  | 820.3623 |
| Max. group size:  |  | 5       | Converged:          |  | Yes      |
| Mean group size:  |  | 3.6     |                     |  |          |

  

|                                                                                                         | Coef.  | Std.Err. | z       | P> z  | [0.025 | 0.975] |
|---------------------------------------------------------------------------------------------------------|--------|----------|---------|-------|--------|--------|
| Intercept                                                                                               | 0.429  | 0.008    | 54.693  | 0.000 | 0.413  | 0.444  |
| C(t, levels=['s', 'b1', 'b2', 'b3', 'b4'])[T.b1]                                                        | -0.111 | 0.009    | -11.730 | 0.000 | -0.129 | -0.092 |
| C(t, levels=['s', 'b1', 'b2', 'b3', 'b4'])[T.b2]                                                        | -0.096 | 0.009    | -10.127 | 0.000 | -0.115 | -0.078 |
| C(t, levels=['s', 'b1', 'b2', 'b3', 'b4'])[T.b3]                                                        | -0.083 | 0.008    | -9.873  | 0.000 | -0.099 | -0.067 |
| C(t, levels=['s', 'b1', 'b2', 'b3', 'b4'])[T.b4]                                                        | -0.042 | 0.011    | -3.758  | 0.000 | -0.064 | -0.020 |
| Group Var                                                                                               |        | 0.015    |         |       |        |        |
| Group x C(t, levels=['s', 'b1', 'b2', 'b3', 'b4'])[T.b1] Cov                                            |        | -0.002   |         |       |        |        |
| C(t, levels=['s', 'b1', 'b2', 'b3', 'b4'])[T.b1] Var                                                    |        | 0.010    |         |       |        |        |
| Group x C(t, levels=['s', 'b1', 'b2', 'b3', 'b4'])[T.b2] Cov                                            |        | -0.005   |         |       |        |        |
| C(t, levels=['s', 'b1', 'b2', 'b3', 'b4'])[T.b1] x C(t, levels=['s', 'b1', 'b2', 'b3', 'b4'])[T.b2] Cov |        | 0.011    |         |       |        |        |
| C(t, levels=['s', 'b1', 'b2', 'b3', 'b4'])[T.b2] Var                                                    |        | 0.014    |         |       |        |        |
| Group x C(t, levels=['s', 'b1', 'b2', 'b3', 'b4'])[T.b3] Cov                                            |        | -0.003   |         |       |        |        |
| C(t, levels=['s', 'b1', 'b2', 'b3', 'b4'])[T.b1] x C(t, levels=['s', 'b1', 'b2', 'b3', 'b4'])[T.b3] Cov |        | 0.007    |         |       |        |        |
| C(t, levels=['s', 'b1', 'b2', 'b3', 'b4'])[T.b2] x C(t, levels=['s', 'b1', 'b2', 'b3', 'b4'])[T.b3] Cov |        | 0.009    |         |       |        |        |
| C(t, levels=['s', 'b1', 'b2', 'b3', 'b4'])[T.b3] Var                                                    |        | 0.010    |         |       |        |        |
| Group x C(t, levels=['s', 'b1', 'b2', 'b3', 'b4'])[T.b4] Cov                                            |        | -0.005   |         |       |        |        |
| C(t, levels=['s', 'b1', 'b2', 'b3', 'b4'])[T.b1] x C(t, levels=['s', 'b1', 'b2', 'b3', 'b4'])[T.b4] Cov |        | 0.003    |         |       |        |        |
| C(t, levels=['s', 'b1', 'b2', 'b3', 'b4'])[T.b2] x C(t, levels=['s', 'b1', 'b2', 'b3', 'b4'])[T.b4] Cov |        | 0.006    |         |       |        |        |
| C(t, levels=['s', 'b1', 'b2', 'b3', 'b4'])[T.b3] x C(t, levels=['s', 'b1', 'b2', 'b3', 'b4'])[T.b4] Cov |        | 0.001    |         |       |        |        |
| C(t, levels=['s', 'b1', 'b2', 'b3', 'b4'])[T.b4] Var                                                    |        | 0.008    |         |       |        |        |

CT
