# Supplementary material for: The adaptive community-response (ACR) method for collecting misinformation on social media
Source: Springer Nature journal article supplement (doi:10.1186/s40537-024-00894-w), 2024-02-24
Supplement: MOESM1 [file 26789060]

# Additional file 1

## The adaptive community-response (ACR) method for collecting misinformation on social media

Julian Kauk<sup>1</sup>, Helene Kreysa<sup>1</sup>, André Scherag<sup>2, 3</sup>, and Stefan R. Schweinberger<sup>1, 3, 4</sup>

<sup>1</sup>*Department of General Psychology and Cognitive Neuroscience, Friedrich Schiller University Jena, Jena, Germany*

<sup>2</sup>*Institute of Medical Statistics, Computer and Data Sciences, Jena University Hospital, Jena, Germany*

<sup>3</sup>*Michael Stifel Center Jena, Jena, Germany*

<sup>4</sup>*German Center for Mental Health (DZPG), Site Jena-Magdeburg-Halle, Germany*

August 29, 2023

## Model of the low prevalence problem on Twitter

For better understanding the low prevalence problem on Twitter, we consider a model of a false story with approximately 100k tweets during a period of one day with the claim 'Two explosions in the White House and Barack Obama is injured'<sup>1</sup>. This story has been debunked within minutes, but it nevertheless spread through Twitter and even induced a negative stock market response [1]. Please note that the numerical values were arbitrarily chosen for illustrative purposes.

However, we also assume that there will be 200 million irrelevant tweets at the same time. Thus, it holds that

$$\begin{aligned} |T| &= 10^5 \text{ and} \\ |Z| &= 2 \cdot 10^8. \end{aligned} \tag{1}$$

To evaluate the performance of the query, we consider  $\text{Recall}(q_i)$ ,  $\text{Precision}(q_i)$  and  $\text{Precise}(q_i)$  (for their respective definitions, see the main text), as well as  $\text{Specificity}(q_i)$  and  $\text{Fall-out}(q_i)$ , as given by

---

<sup>1</sup>see, e.g., <https://eu.usatoday.com/story/theoval/2013/04/23/obama-carney-associated-press-hack-white-house/2106757/>

$$\begin{aligned}
\text{Fall-out}(q_i) &= \frac{|\text{FP}(q_i)|}{|Z|} \text{ and} \\
\text{Specificity}(q_1) &= \frac{|\text{TN}(q_i)|}{|Z|} \\
&= 1 - \text{Fall-out}(q_i).
\end{aligned}
\tag{2}$$

Fall-out( $q_i$ ) is reflecting the proportion of irrelevant tweets that would be classified as story-supportive, while Specificity( $q_i$ ) stands for the fraction of irrelevant tweets that would be correctly classified as irrelevant.

However, when considering an exemplary query  $q_1$  to detect tweets in  $T$ , let

$$\begin{aligned}
\text{Recall}(q_1) &= .8, \\
\text{Fall-out}(q_1) &= 10^{-3} \text{ and} \\
\text{Specificity}(q_1) &= 1 - \text{Fall-out}(q_1) \\
&= .999.
\end{aligned}
\tag{3}$$

Prima facie, these measures can be interpreted as 'convincing': While 80% of the story-supporting tweets would be detected (recall), only one out of thousand irrelevant tweets would be misclassified as positive (fall-out) and, vice versa, 999 would be correctly classified as negative (specificity). However, because of the low prevalence of  $T$ , the number of false positive tweets yielded by this query would be

$$\begin{aligned}
|\text{FP}(q_1)| &= \text{Fall-out}(q_1) \cdot |Z| \\
&= 10^{-3} \cdot 2 \cdot 10^8 \\
&= 2 \cdot 10^5,
\end{aligned}
\tag{4}$$

meaning that this query would fetch 200k false positive tweets. The number of true positive tweets, reflecting the number of tweets in  $T$  detected by the query, is given by

$$\begin{aligned}
|\text{TP}(q_1)| &= \text{Recall}(q_1) \cdot |T| \\
&= .8 \cdot 10^5 \\
&= 8 \cdot 10^4,
\end{aligned}
\tag{5}$$

meaning that 80k story-supporting tweets would be detected by the query. In total, this query would therefore yield  $N(q_1) = 280\text{k}$  tweets. The precision of  $q_1$  is therefore given by

$$\begin{aligned}
\text{Precision}(q_1) &= \frac{|\text{TP}(q_1)|}{N(q_1)} \\
&= \frac{8 \cdot 10^4}{2.8 \cdot 10^5} \\
&= .286,
\end{aligned}
\tag{6}$$

meaning that almost only one out of four of the matched tweets would truly support the story. The high number of false positive tweets yielded by this hypothetical query leads to an unfavorable signal-to-noise ratio, rendering (statistical) conclusions drawn from these data impossible. Thus, defining a lower bound of precision (as defined in the main document by 0.9) seems reasonable.

Consequently, we refrain from using  $q_1$  for tweet retrieval, as  $\text{Precision}(q_1) < 0.9$  (see also Table 1). Therefore, identifying a more specific query seems mandatory, but may lead to a loss of recall (specificity-recall tradeoff). Such a decrease in recall may be considered to be 'acceptable', as a story typically involves thousands of tweets, meaning that even a relatively small subset of them should be representative according to the law of large numbers.

Table 1: **Different queries aiming to collect tweets supporting the White House explosions story.**

|               | $q_1$ : OBAMA | $q_2$ : OBAMA WHITE<br>HOUSE | $q_3$ : OBAMA<br>EXPLOSIONS | $q_4$ : OBAMA<br>INJURED<br>EXPLOSIONS |
|---------------|---------------|------------------------------|-----------------------------|----------------------------------------|
| $ \text{TP} $ | 80k           | 70k                          | 45k                         | 35k                                    |
| $ \text{FP} $ | 200k          | 100k                         | 2k                          | 1k                                     |
| $N$           | 280k          | 170k                         | 47k                         | 36k                                    |
| Recall        | .8            | .7                           | .45                         | .35                                    |
| Fall – out    | $10^{-3}$     | $.5 \cdot 10^{-3}$           | $10^{-5}$                   | $.5 \cdot 10^{-5}$                     |
| Precision     | .286          | .412                         | .957                        | .972                                   |
| Precise       | 0             | 0                            | 1                           | 1                                      |

Note: We set the number of supporting tweets arbitrarily to 100k and all the results shown were chosen arbitrarily for illustrative purposes.

However, increasing specificity in the context of tweet retrieval can be achieved by adding one or more conjuncts, i.e., keywords, to the query. Query  $q_2$  was made more specific by adding the keywords 'white house'. This leads to a relatively small recall decrease ( $\Delta = 0.1$ ), while fall-out halves. The query nevertheless remains relatively imprecise: Not even every second of the matched tweets is related to the story. The apparent problem with  $q_1$  and  $q_2$  is that they are not specific enough regarding the story of interest: These keywords may also occur in tweets related to other (irrelevant) stories, e.g., 'Obama announces tax rise during White House press briefing'.

This problem can be addressed by adding story-specific keywords, e.g., 'explosions'. Query  $q_3$  shows significant recall loss relative to  $q_1$  ( $\Delta = 0.35$ ), but fall-out decreases disproportionately on the order of  $10^2$ . Consequently, precision increased substantially to a value greater than 0.9, leaving  $q_3$  as a favorable choice for tweet collection.

There may also be other queries exceeding the precision threshold. Query  $q_4$  (which adds the keyword 'injured') is more precise compared to  $q_3$ , but it is also accompanied by a loss of recall ( $\Delta = 0.1$ ) compared to  $q_3$ . However, according to our precision criterion, both queries  $q_3$  and  $q_4$  would be classified as appropriate for tweet collection.

## References

- [1] Vosoughi S, Roy D, Aral S (2018) The spread of true and false news online. *Science* 359(6380), DOI 10.1126/science.aap9559
