# Supplementary material for: The adaptive community-response (ACR) method for collecting misinformation on social media
Source: Springer Nature journal article supplement (doi:10.1186/s40537-024-00894-w), 2024-02-24
Supplement: MOESM2 [file 26789060]

# **Additional file 2**

## **The adaptive community-response (ACR) method for collecting misinformation on social media**

Julian Kauk<sup>1</sup>, Helene Kreysa<sup>1</sup>, André Scherag<sup>2, 3</sup>, and Stefan R. Schweinberger<sup>1, 3, 4</sup>

<sup>1</sup>*Department of General Psychology and Cognitive Neuroscience, Friedrich Schiller University Jena, Jena, Germany*

<sup>2</sup>*Institute of Medical Statistics, Computer and Data Sciences, Jena University Hospital, Jena, Germany*

<sup>3</sup>*Michael Stifel Center Jena, Jena, Germany*

<sup>4</sup>*German Center for Mental Health (DZPG), Site Jena-Magdeburg-Halle, Germany*

August 29, 2023

### **Additional figures concerning the ACR method**

The following document provides three additional figures concerning the ACR method.



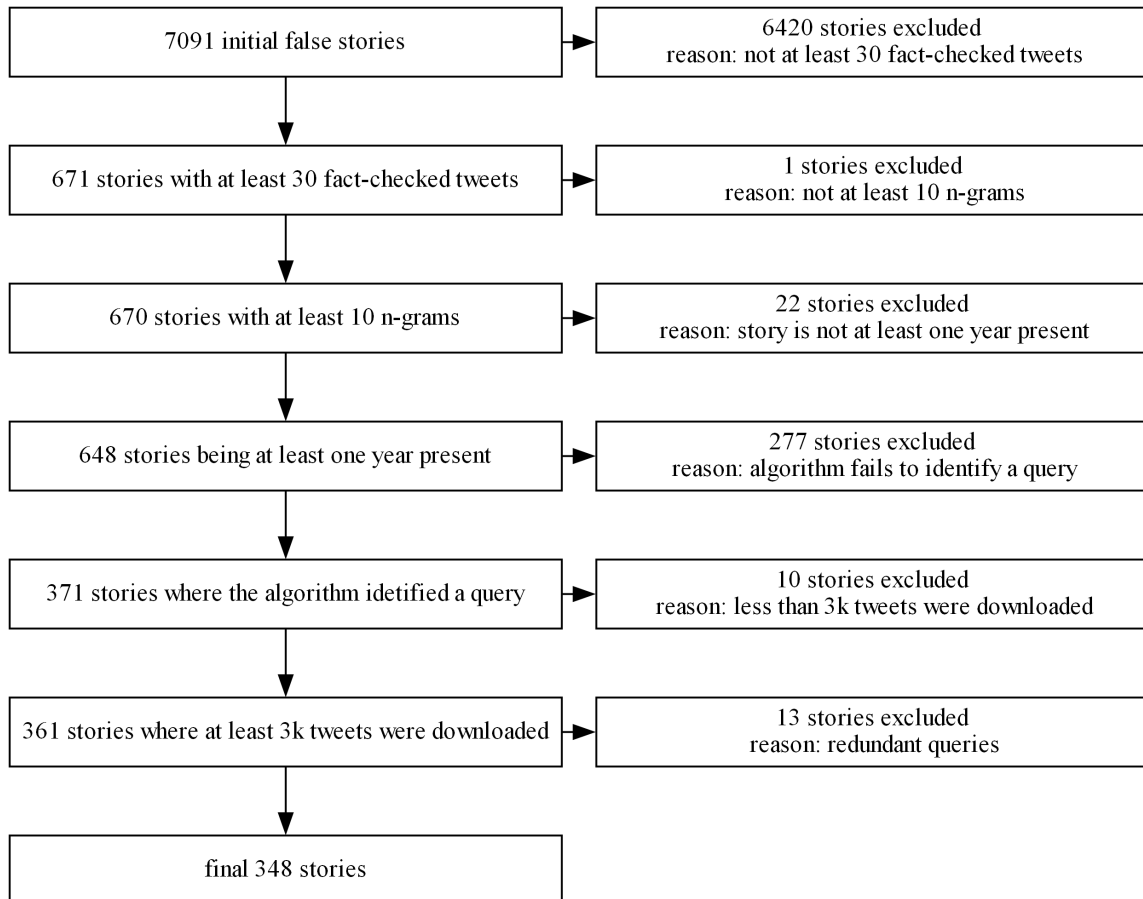

Figure 2: Flowchart of the data collection process.

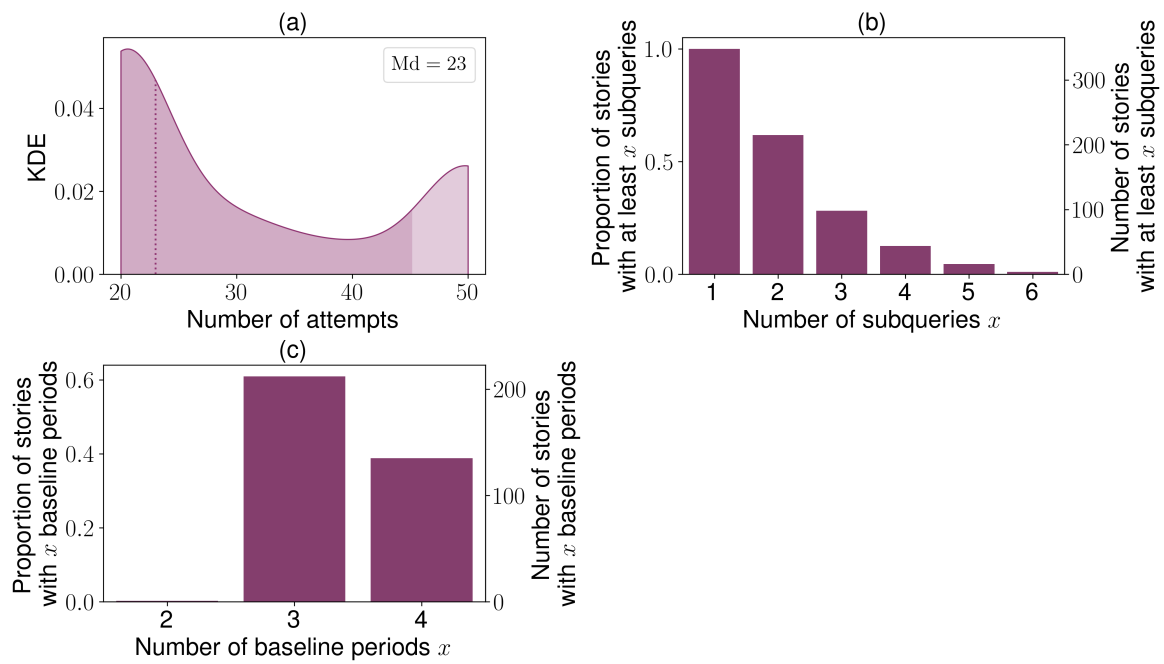

Figure 3: Relevant distributions concerning the data collection process. (a) KDE for the (minimal) number of attempts per story to identify a query. (b) Empirical complementary cumulative distribution function of the number of subqueries. (c) The distribution of the number of baselines.
