# Supplementary material for: The adaptive community-response (ACR) method for collecting misinformation on social media
Source: Springer Nature journal article supplement (doi:10.1186/s40537-024-00894-w), 2024-02-24
Supplement: MOESM5 [file 26789060]

# Additional file 5

## The adaptive community-response (ACR) method for collecting misinformation on social media

Julian Kauk<sup>1</sup>, Helene Kreysa<sup>1</sup>, André Scherag<sup>2, 3</sup>, and Stefan R. Schweinberger<sup>1, 3, 4</sup>

<sup>1</sup>*Department of General Psychology and Cognitive Neuroscience, Friedrich Schiller University Jena, Jena, Germany*

<sup>2</sup>*Institute of Medical Statistics, Computer and Data Sciences, Jena University Hospital, Jena, Germany*

<sup>3</sup>*Michael Stifel Center Jena, Jena, Germany*

<sup>4</sup>*German Center for Mental Health (DZPG), Site Jena-Magdeburg-Halle, Germany*

August 29, 2023

### Text similarity on story level over story period and baselines

The following document provides a multipage figure showing text similarity on the story level over story period and baselines, allowing us to evaluate the validity of the ACR method for each story individually. Please note that each panel of the figure reflects a story, while the mean text similarity is given for each baseline  $b_i$  and the story period  $s$ . Error bars reflect 95% confidence interval. The gray dashed line represents the mean of the story period; therefore, baselines means should be below this line. We also performed Welch's  $t$ -tests to check whether the text similarity during the story period was significantly higher than all other baselines; if so, the panel is colored purple, otherwise gray.

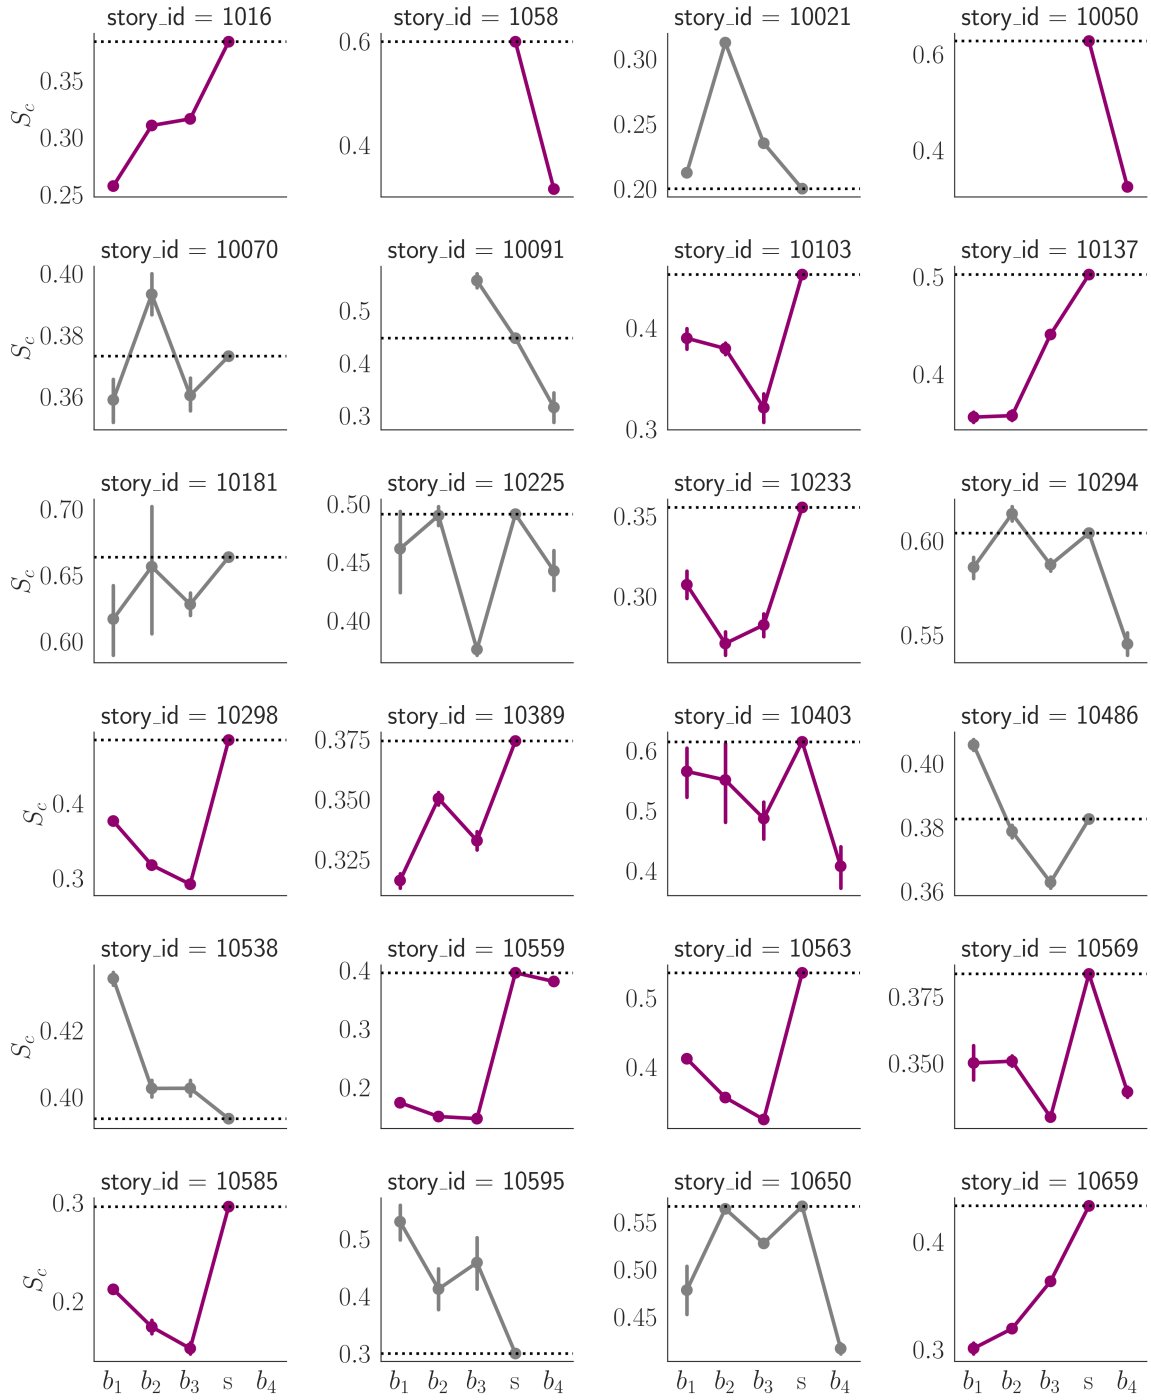

Figure 1: Text similarity on the story level over baselines and story period.

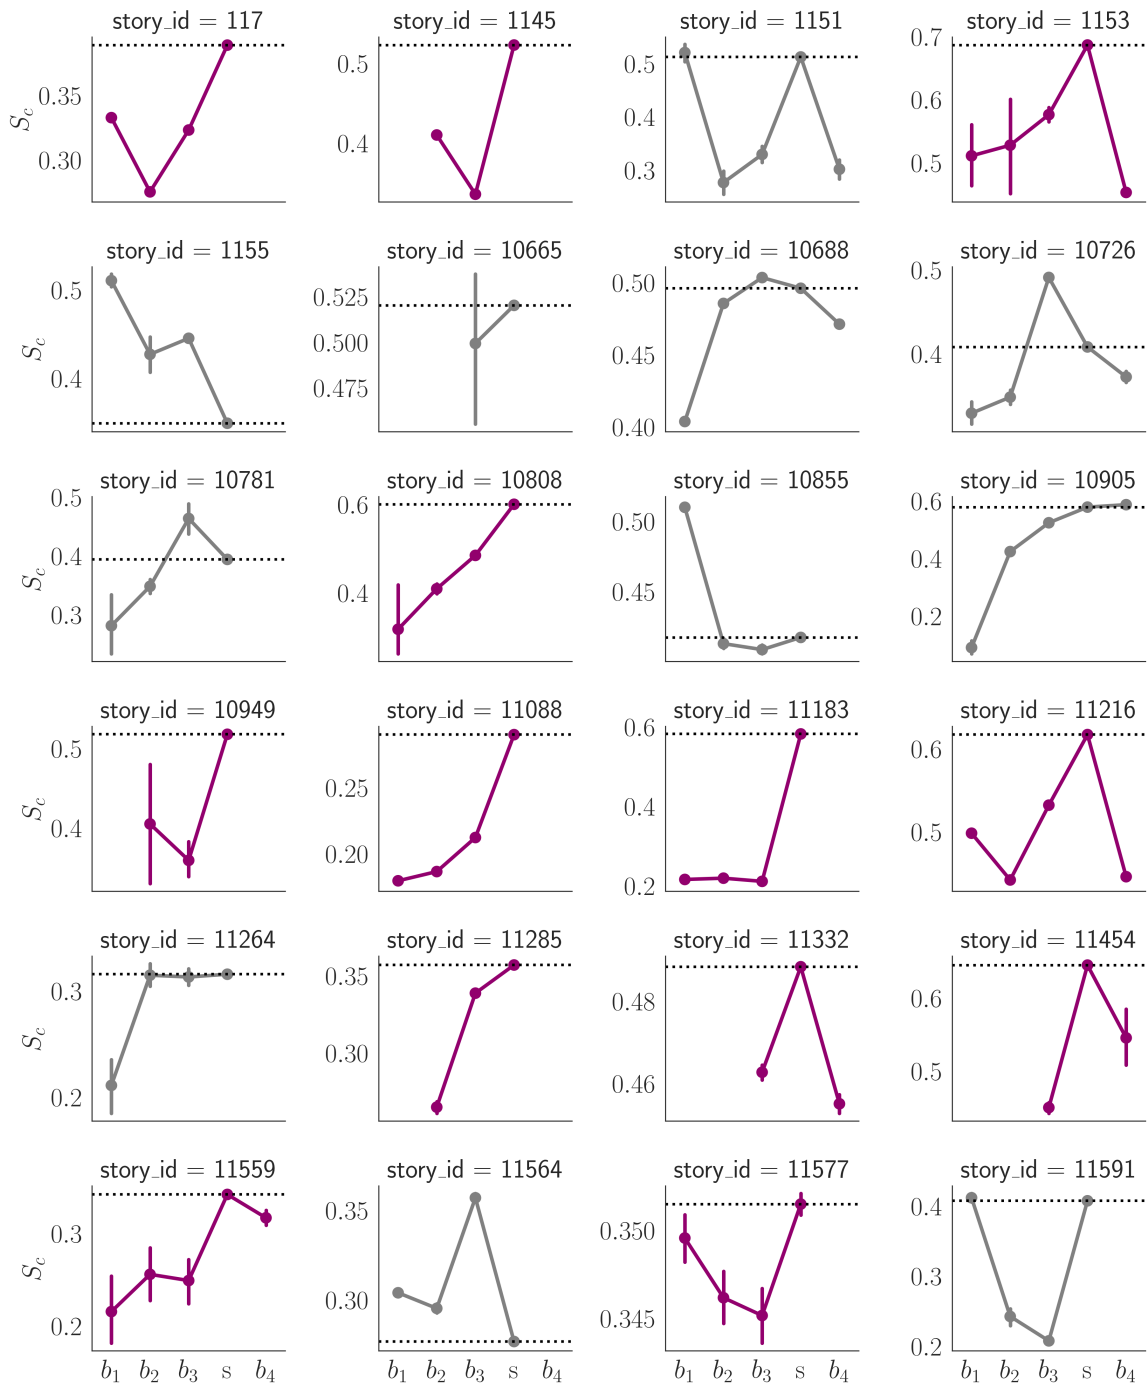

Figure 1: (Continued)

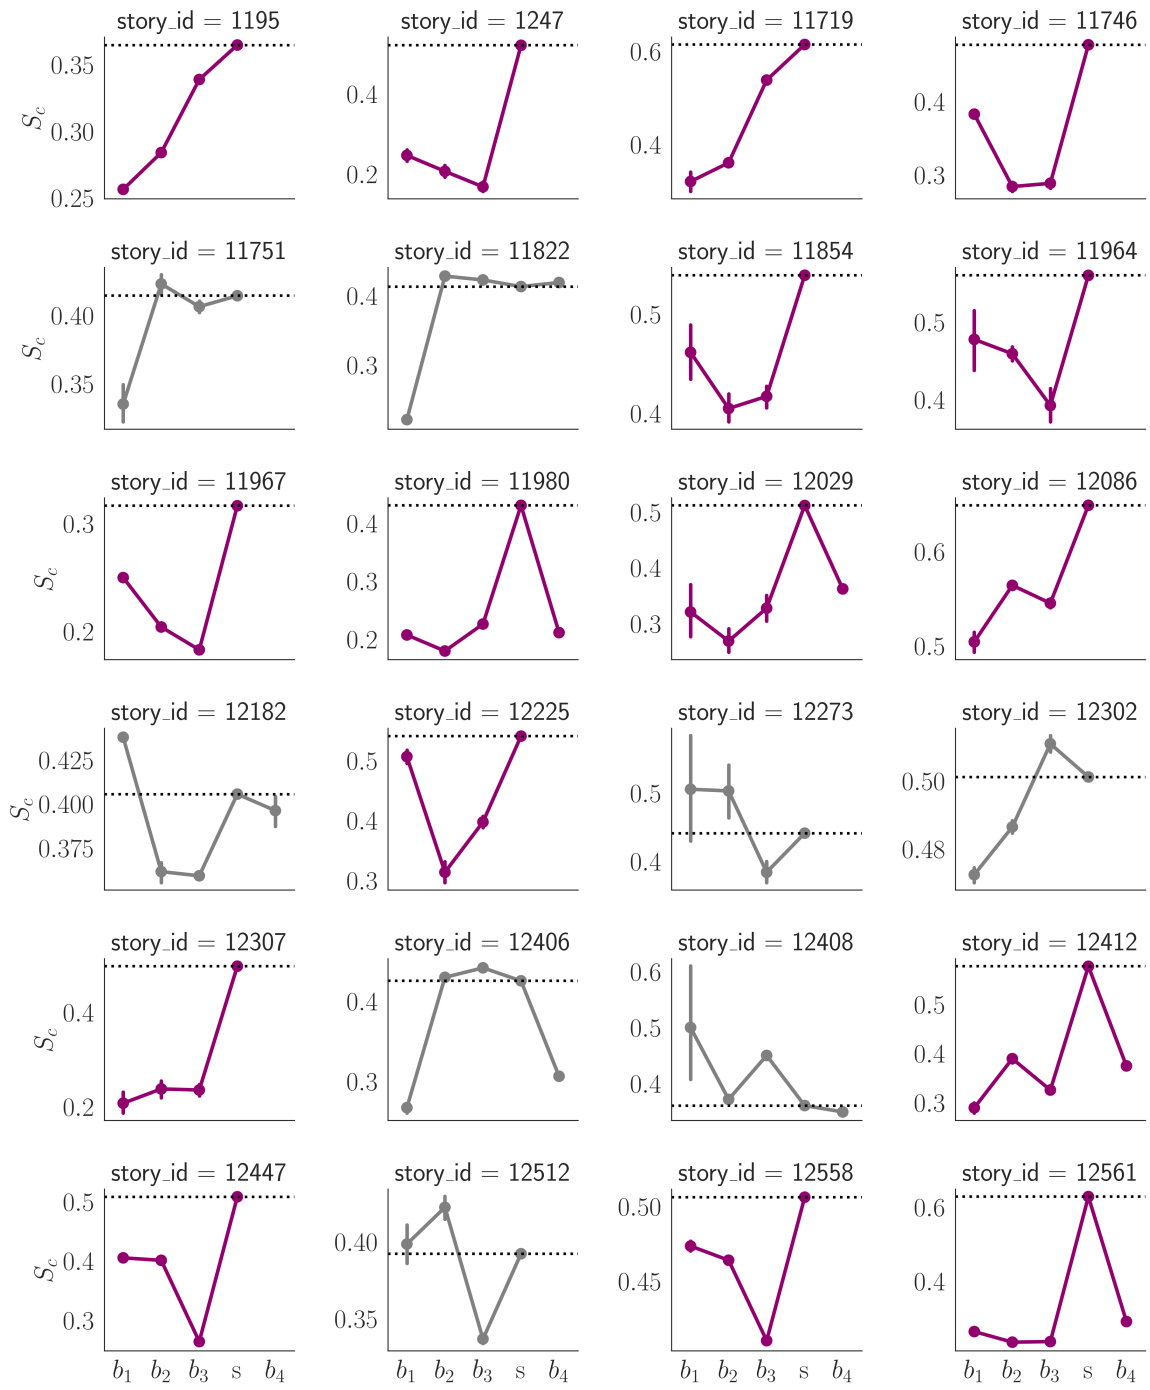

Figure 1: (Continued)

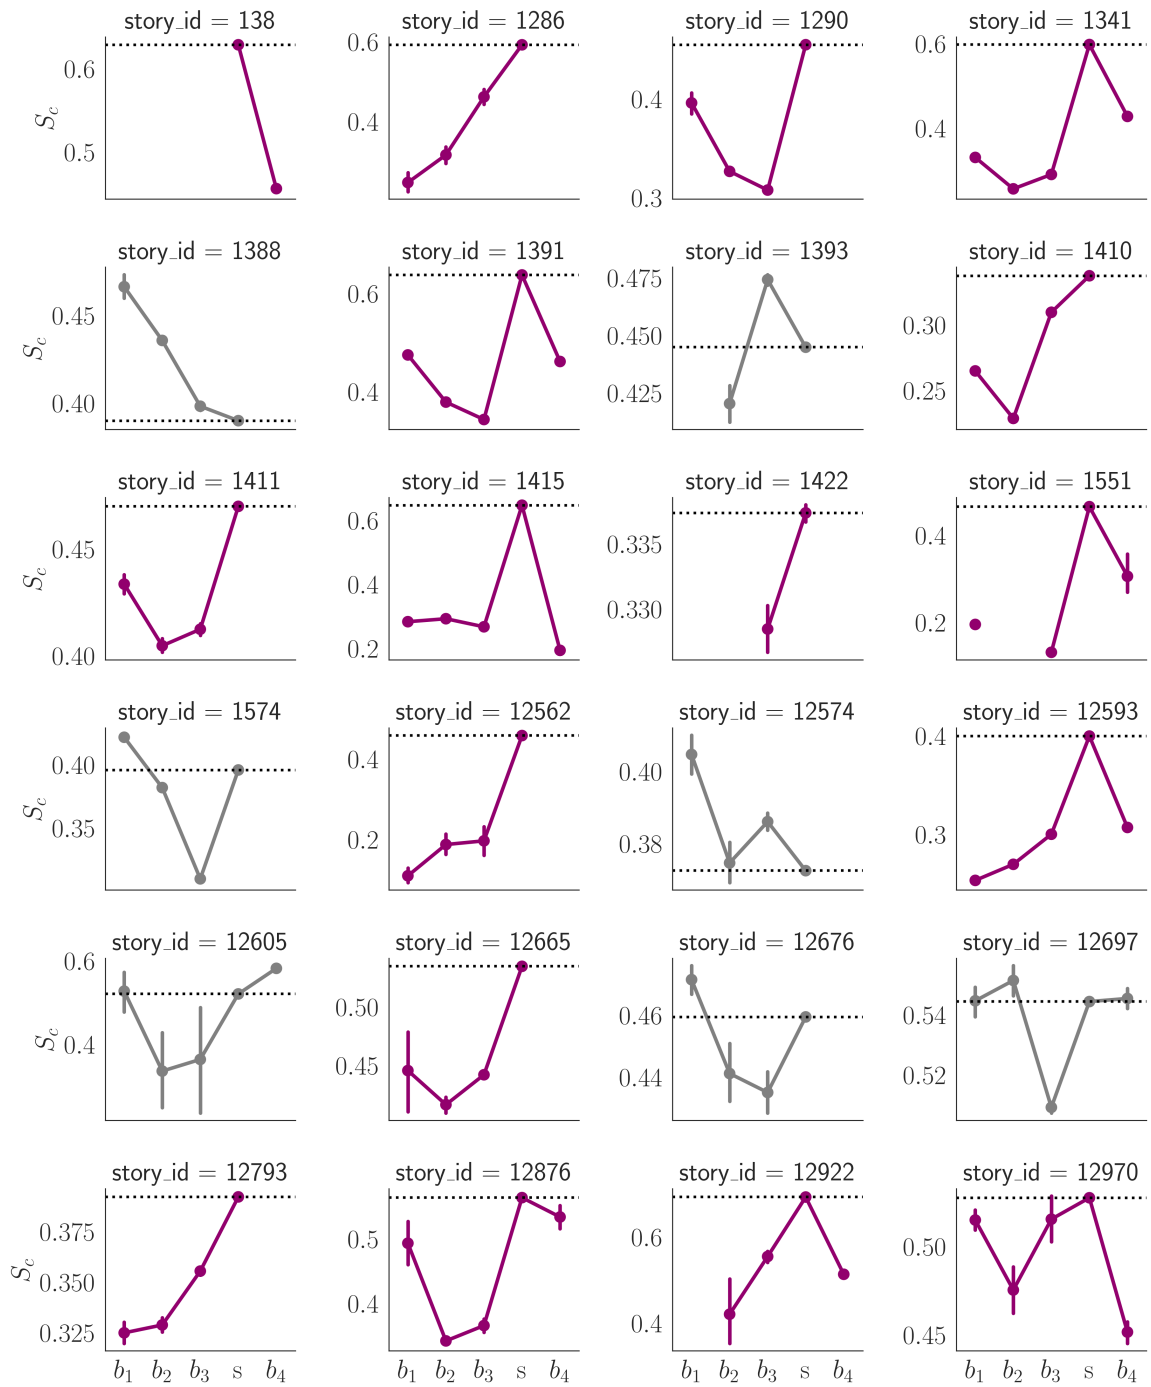

Figure 1: (Continued)

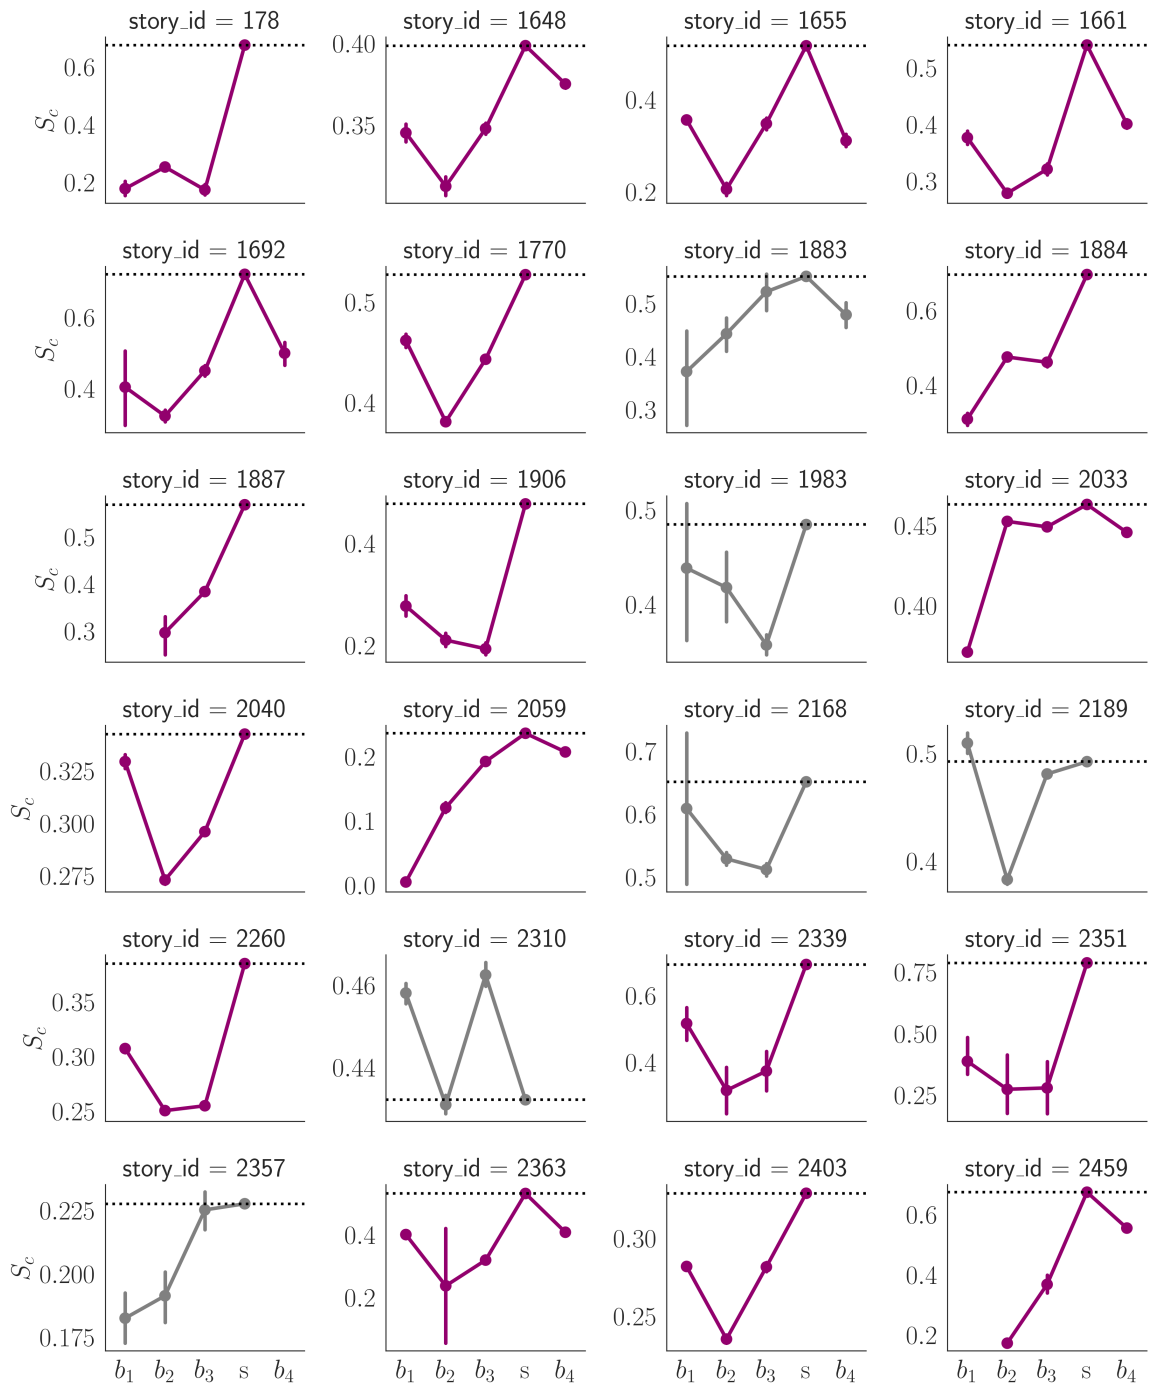

Figure 1: (Continued)

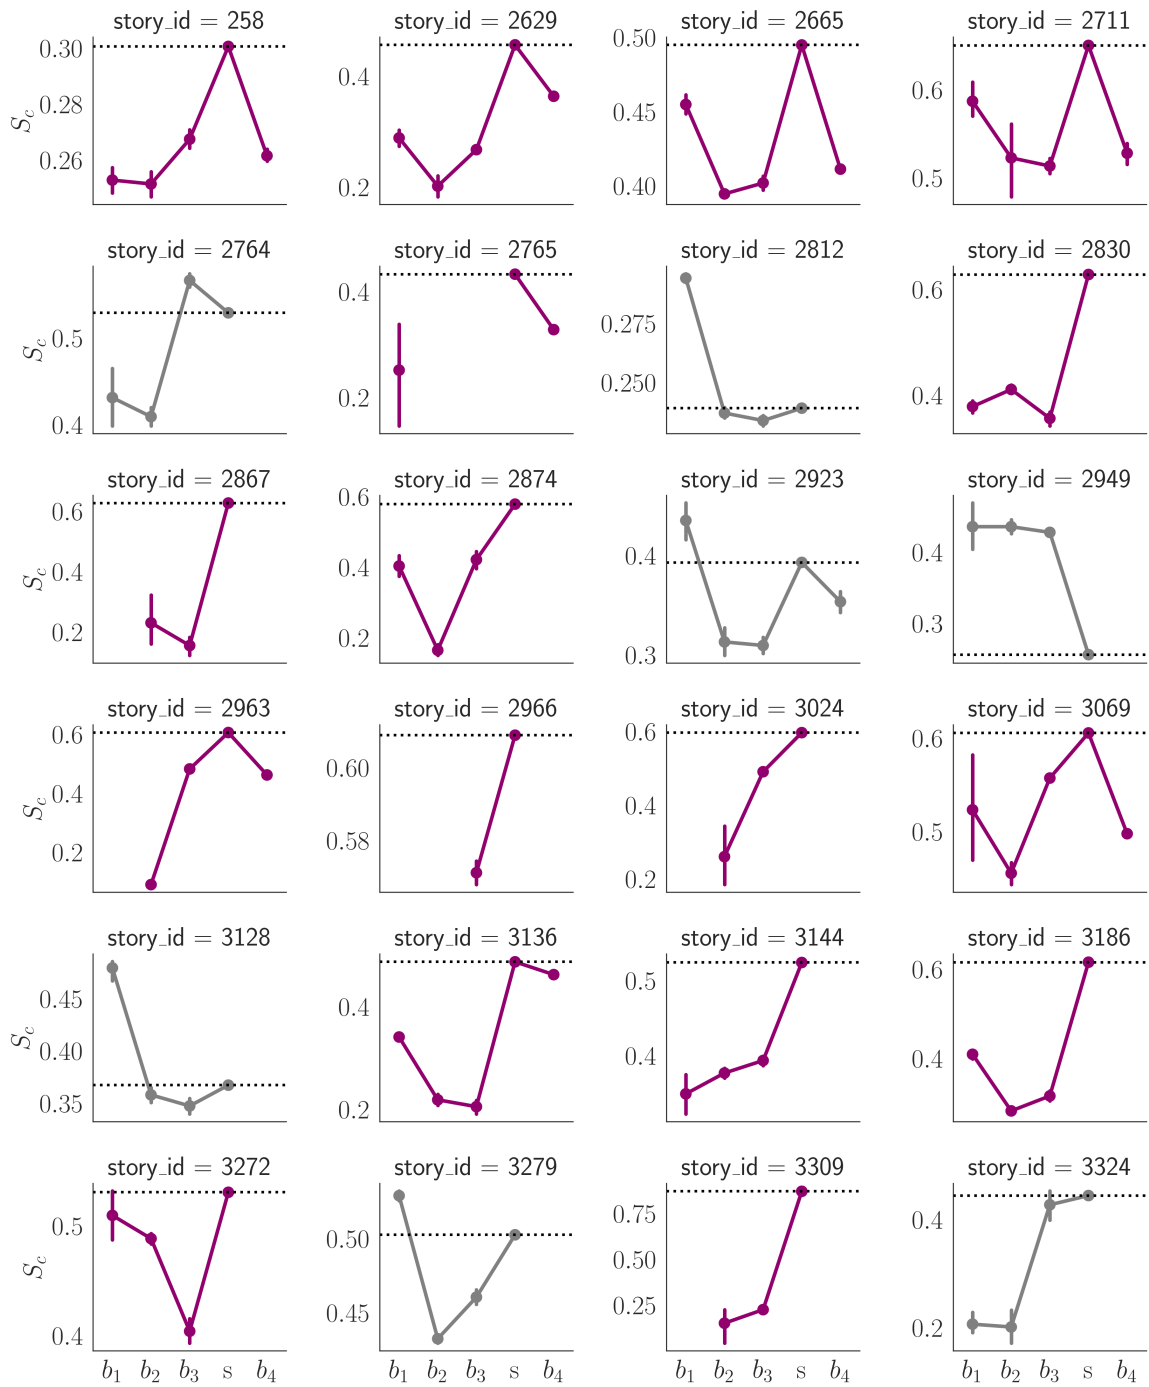

Figure 1: (Continued)

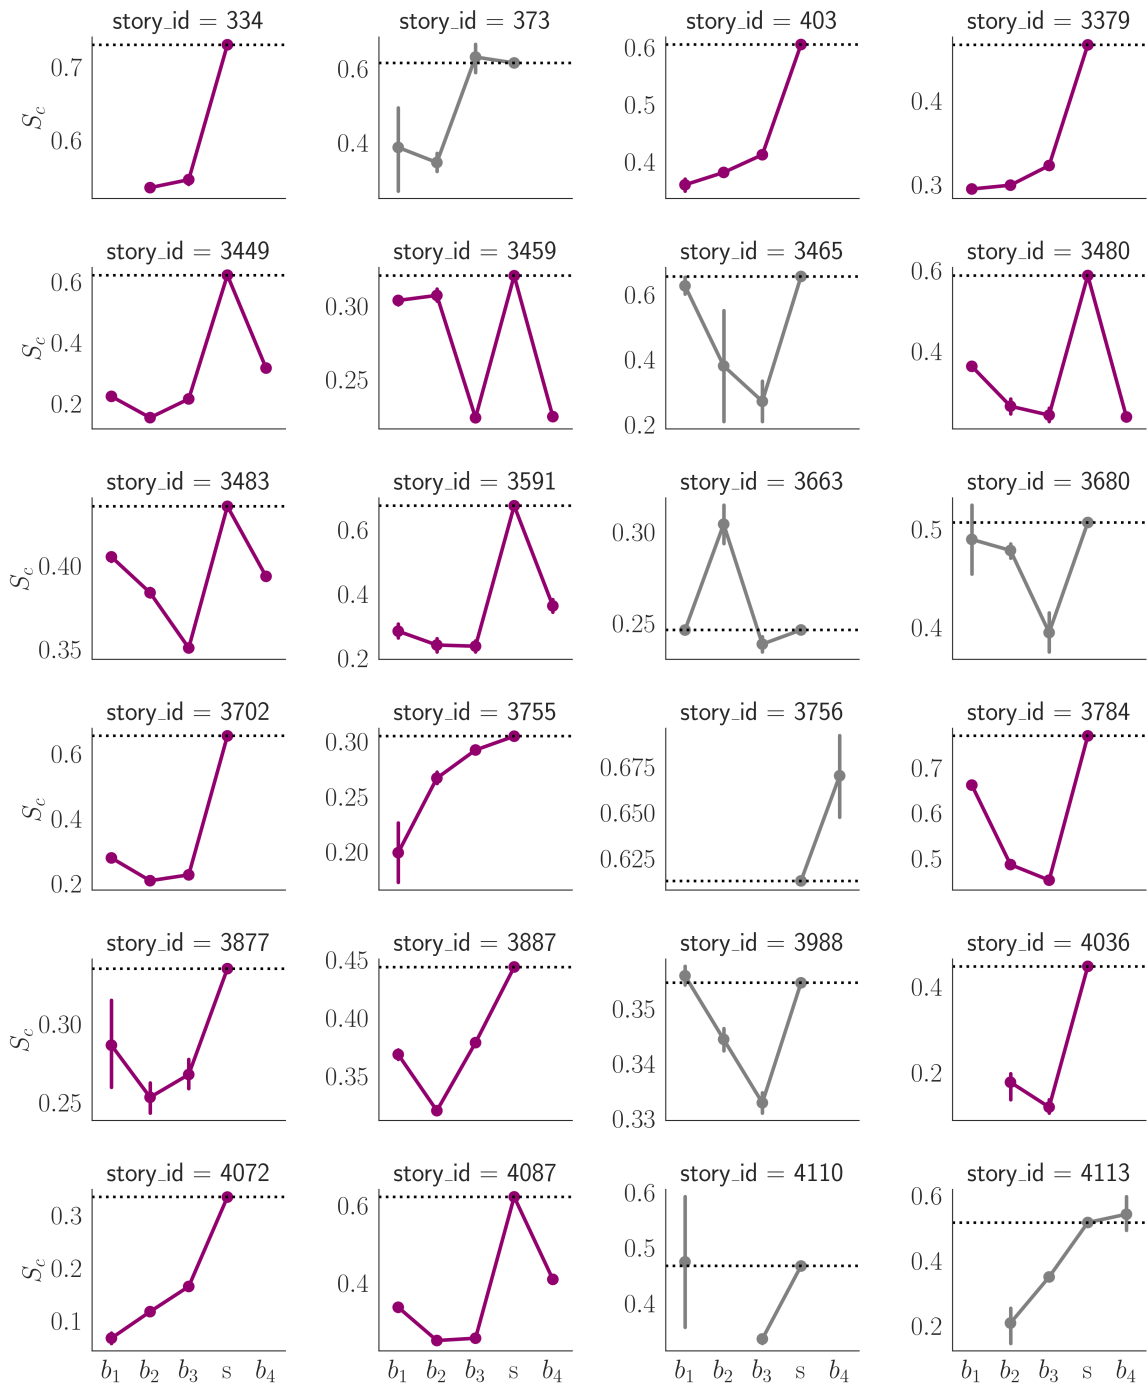

Figure 1: (Continued)



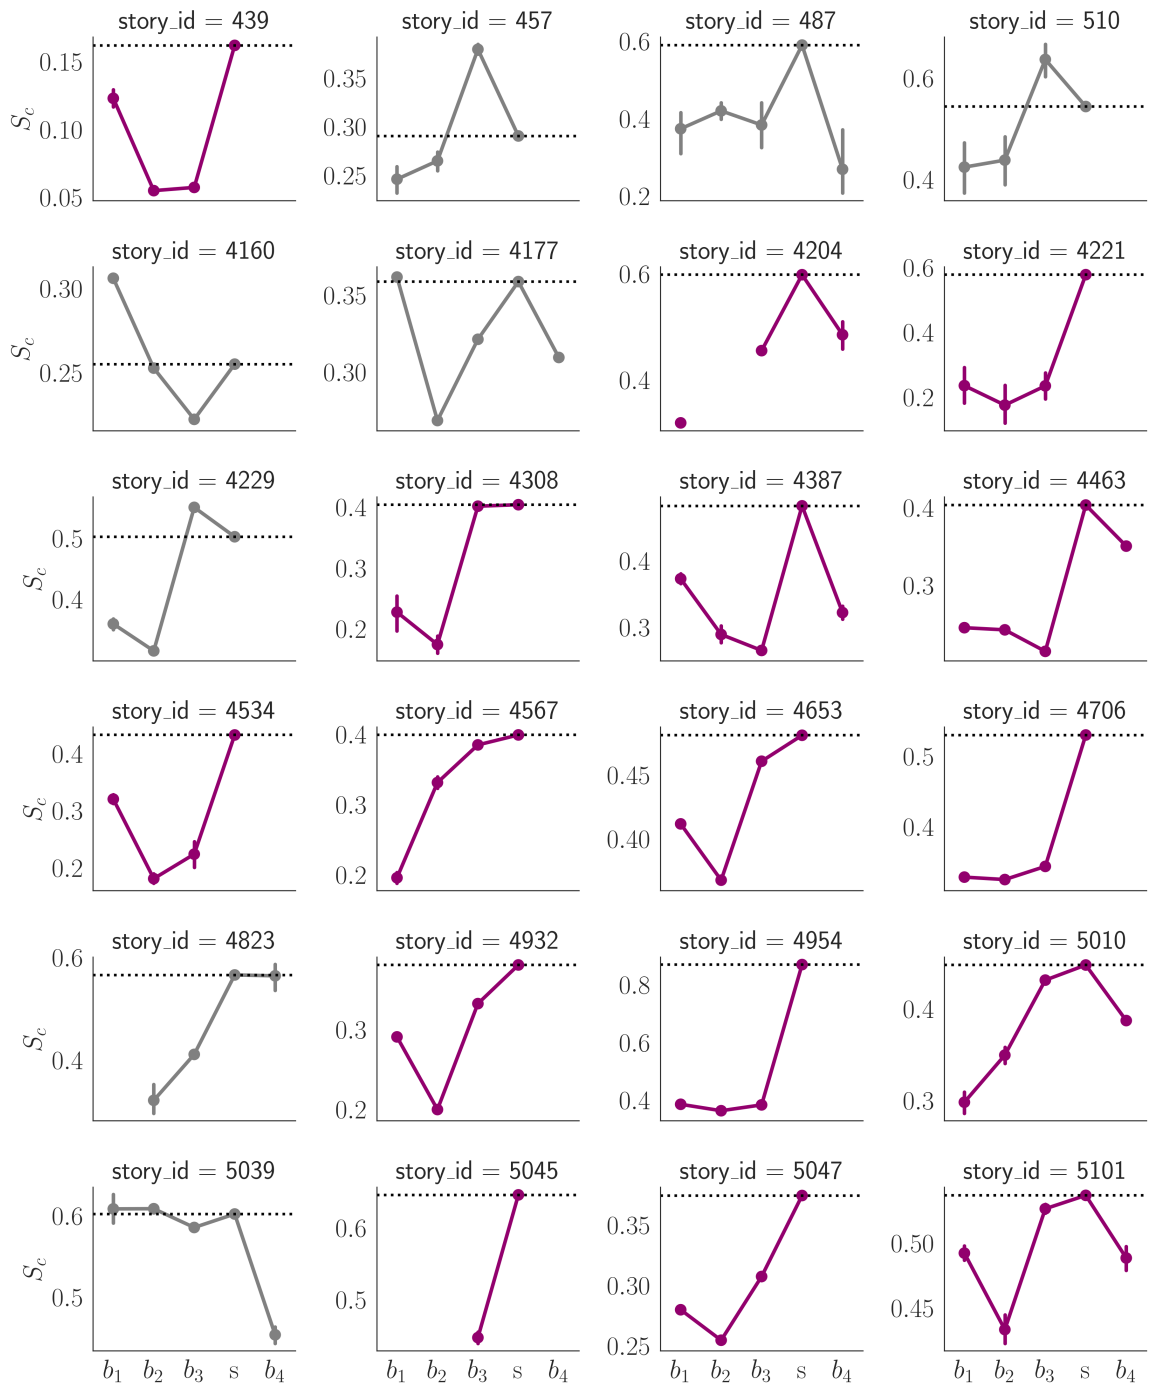

Figure 1: (Continued)

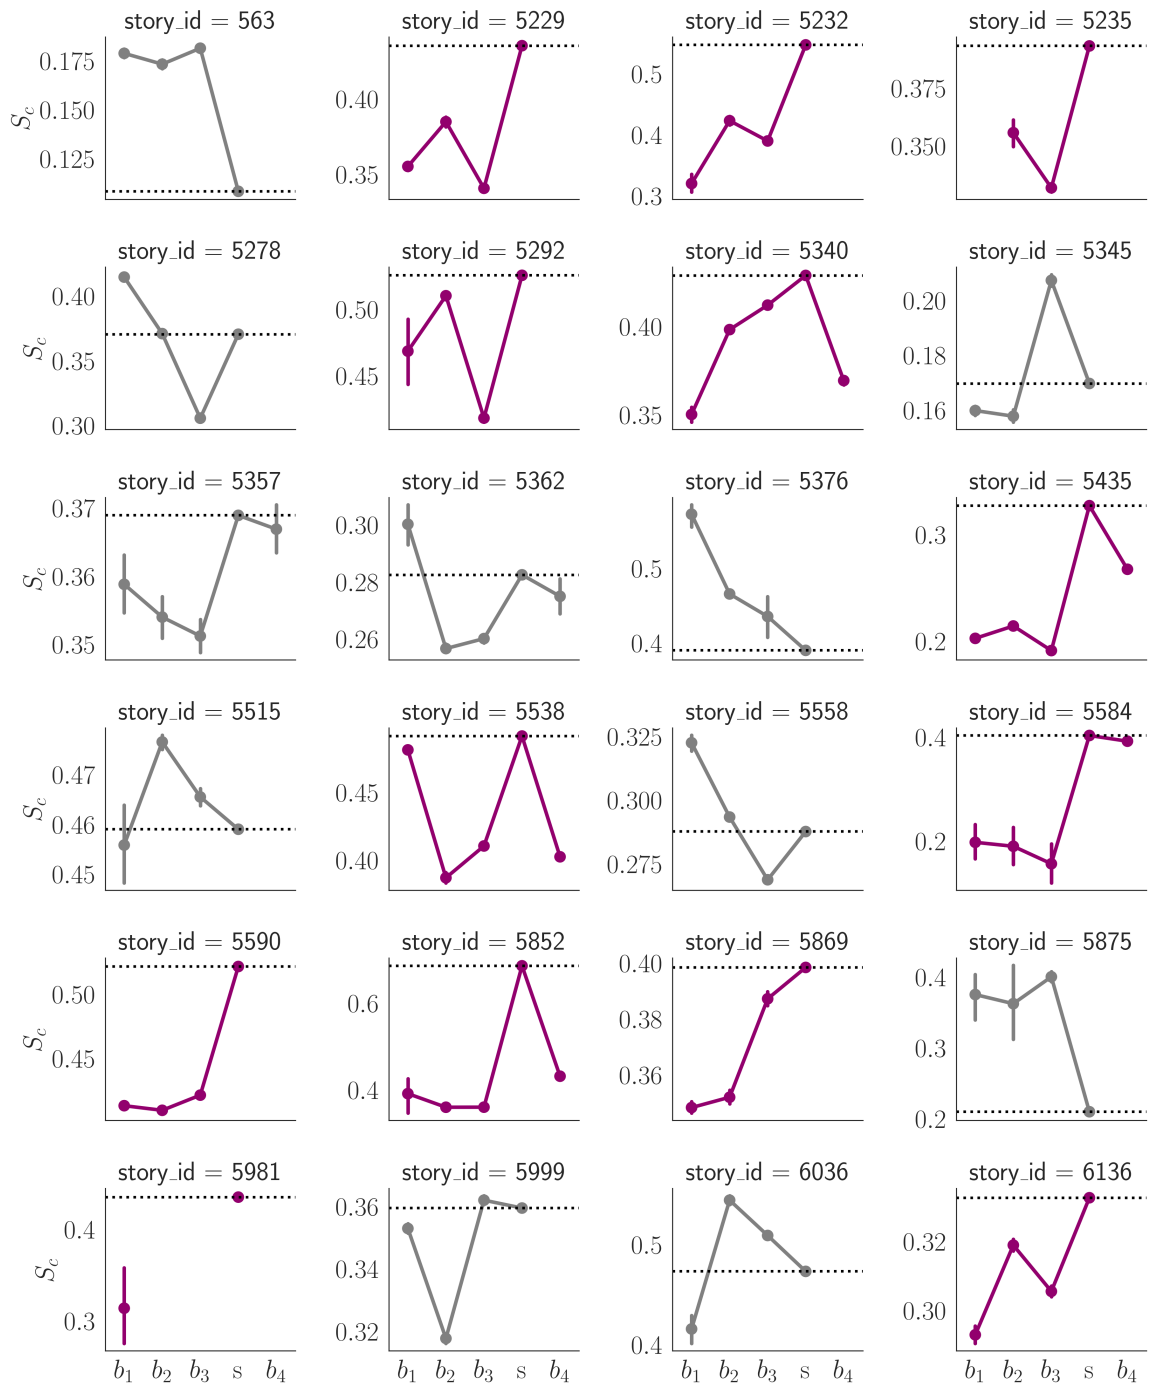

Figure 1: (Continued)

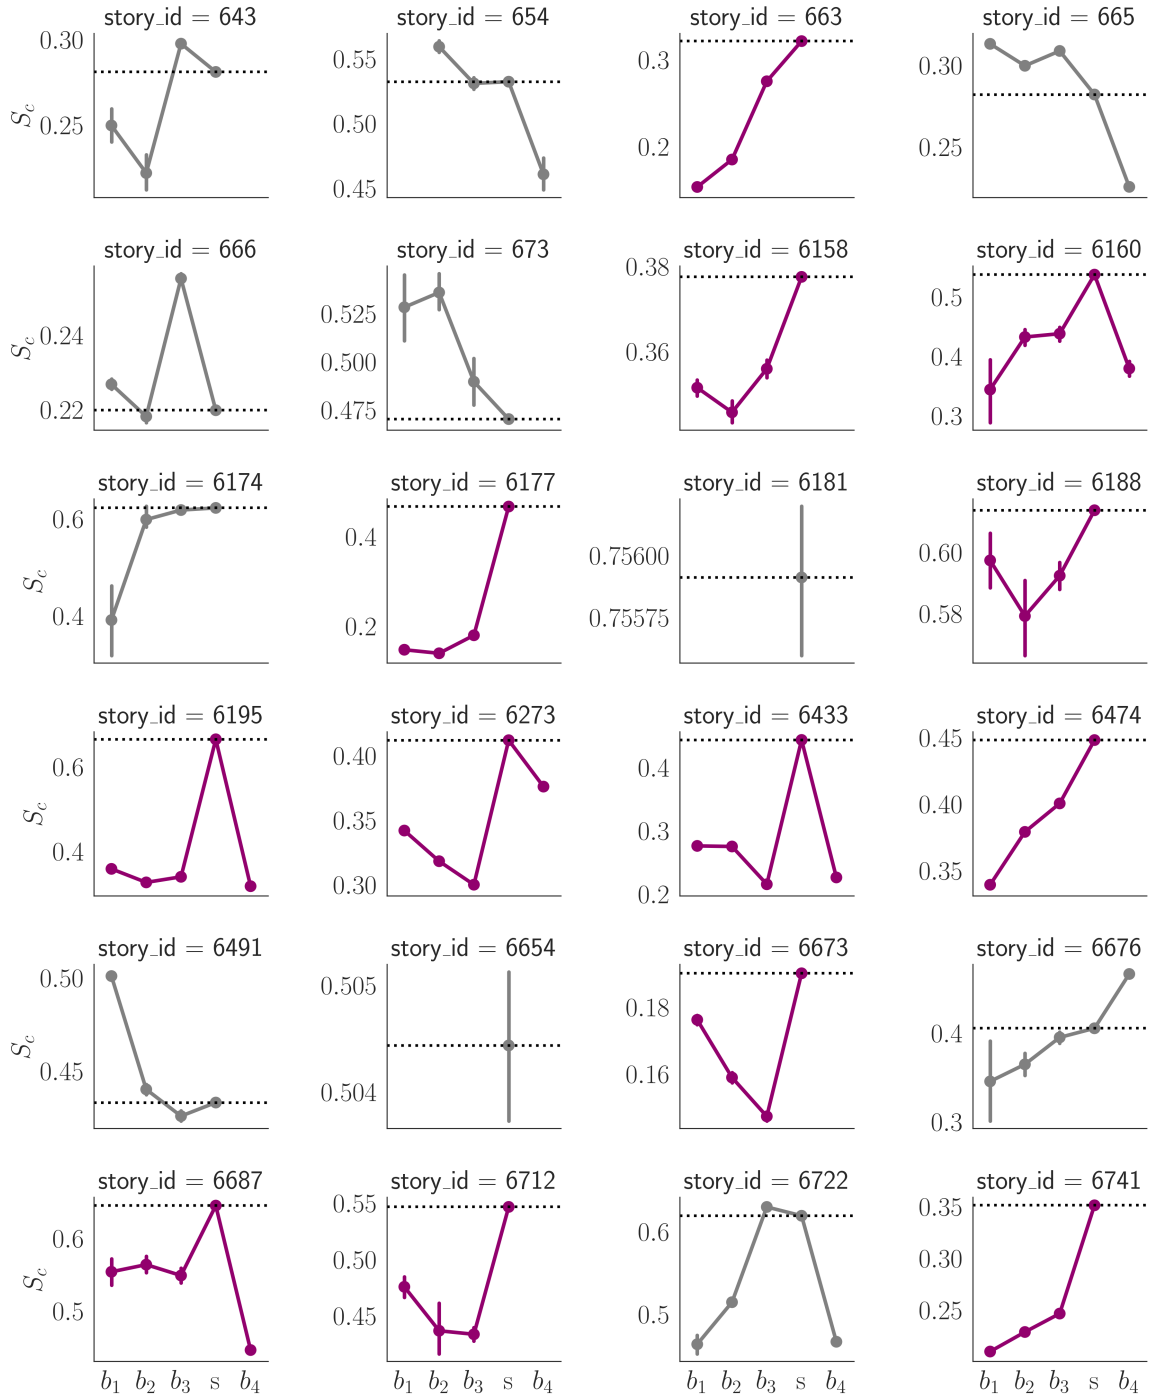

Figure 1: (Continued)

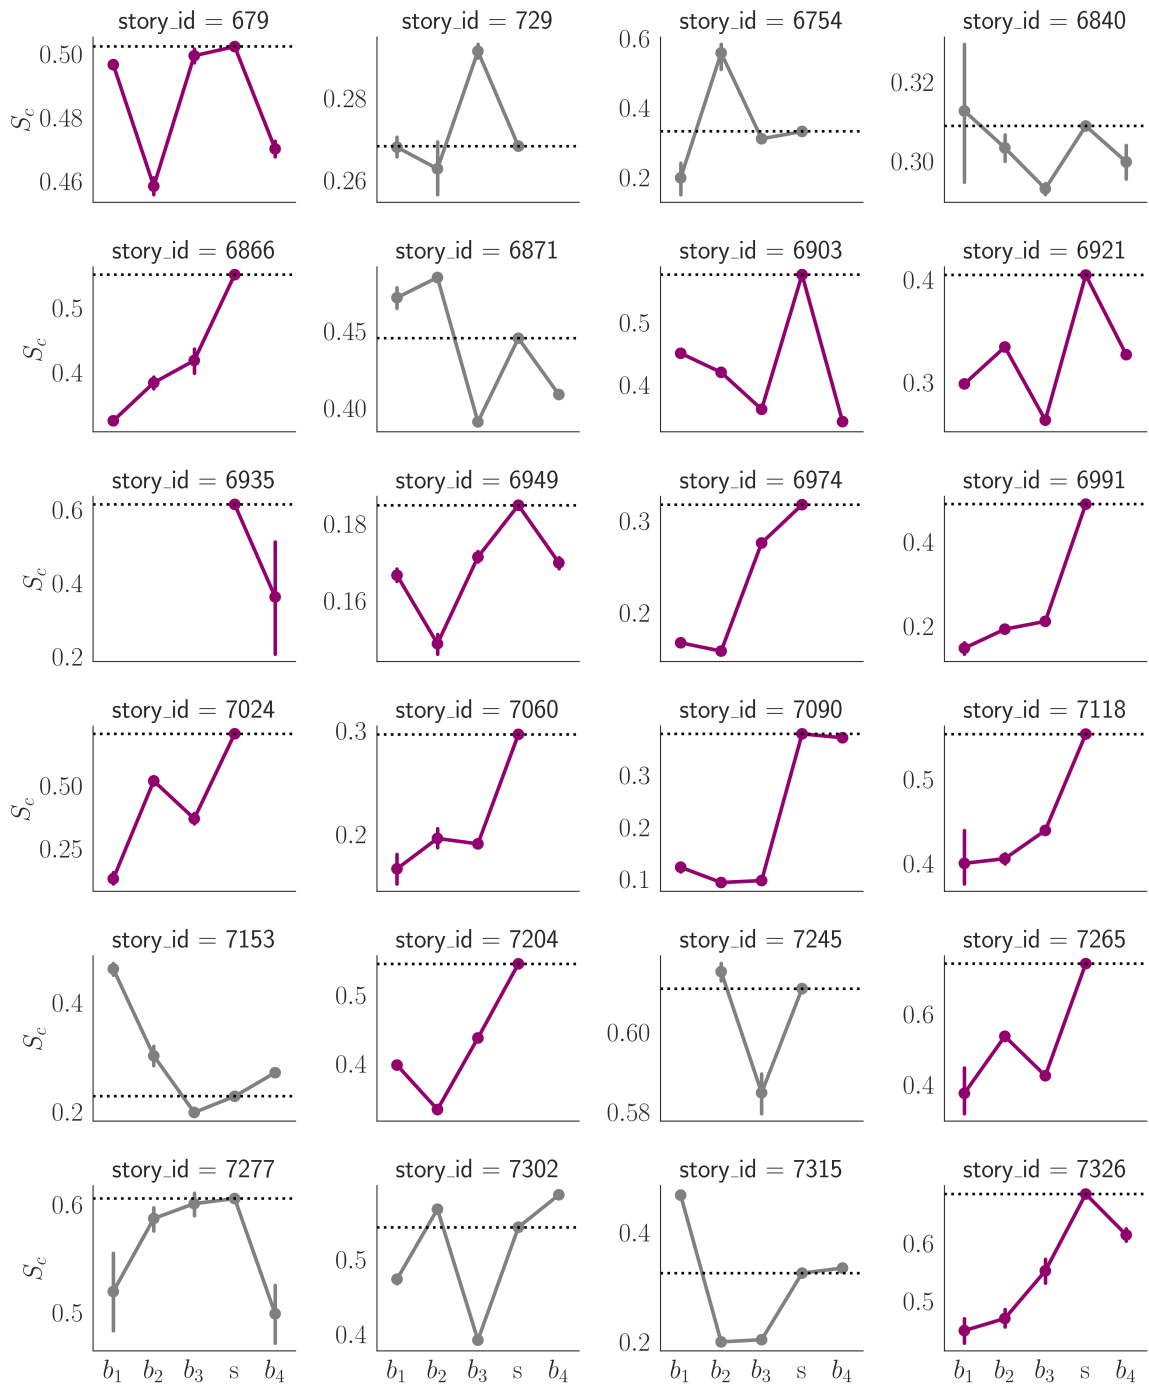

Figure 1: (Continued)

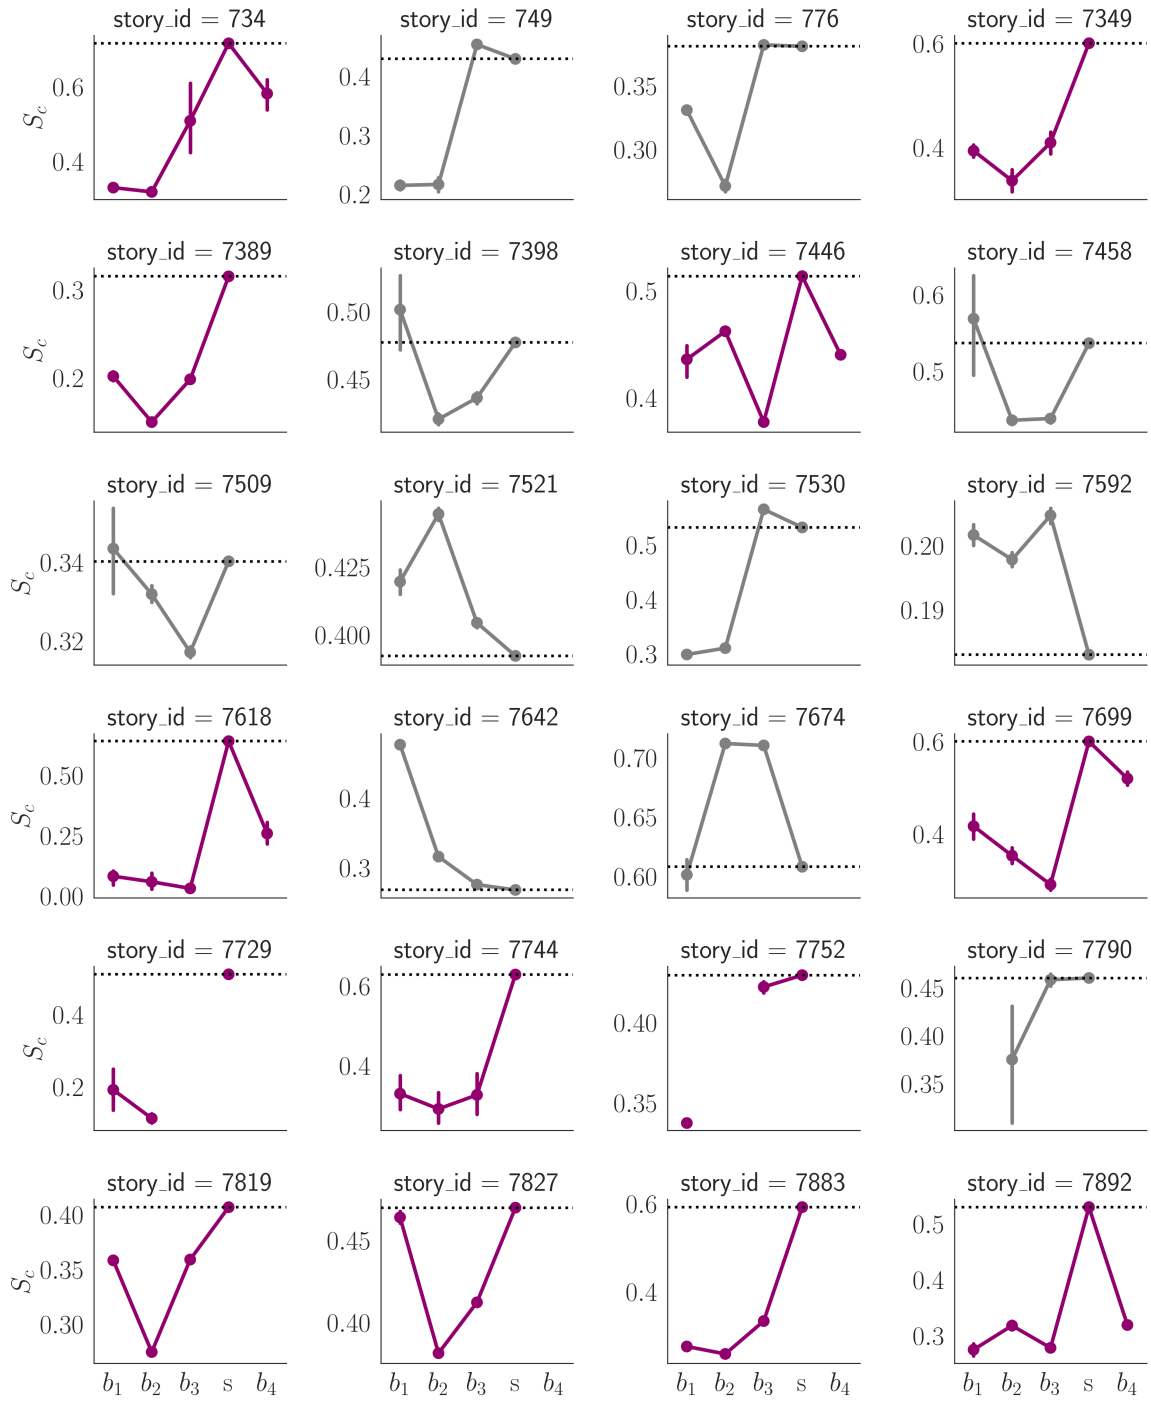

Figure 1: (Continued)

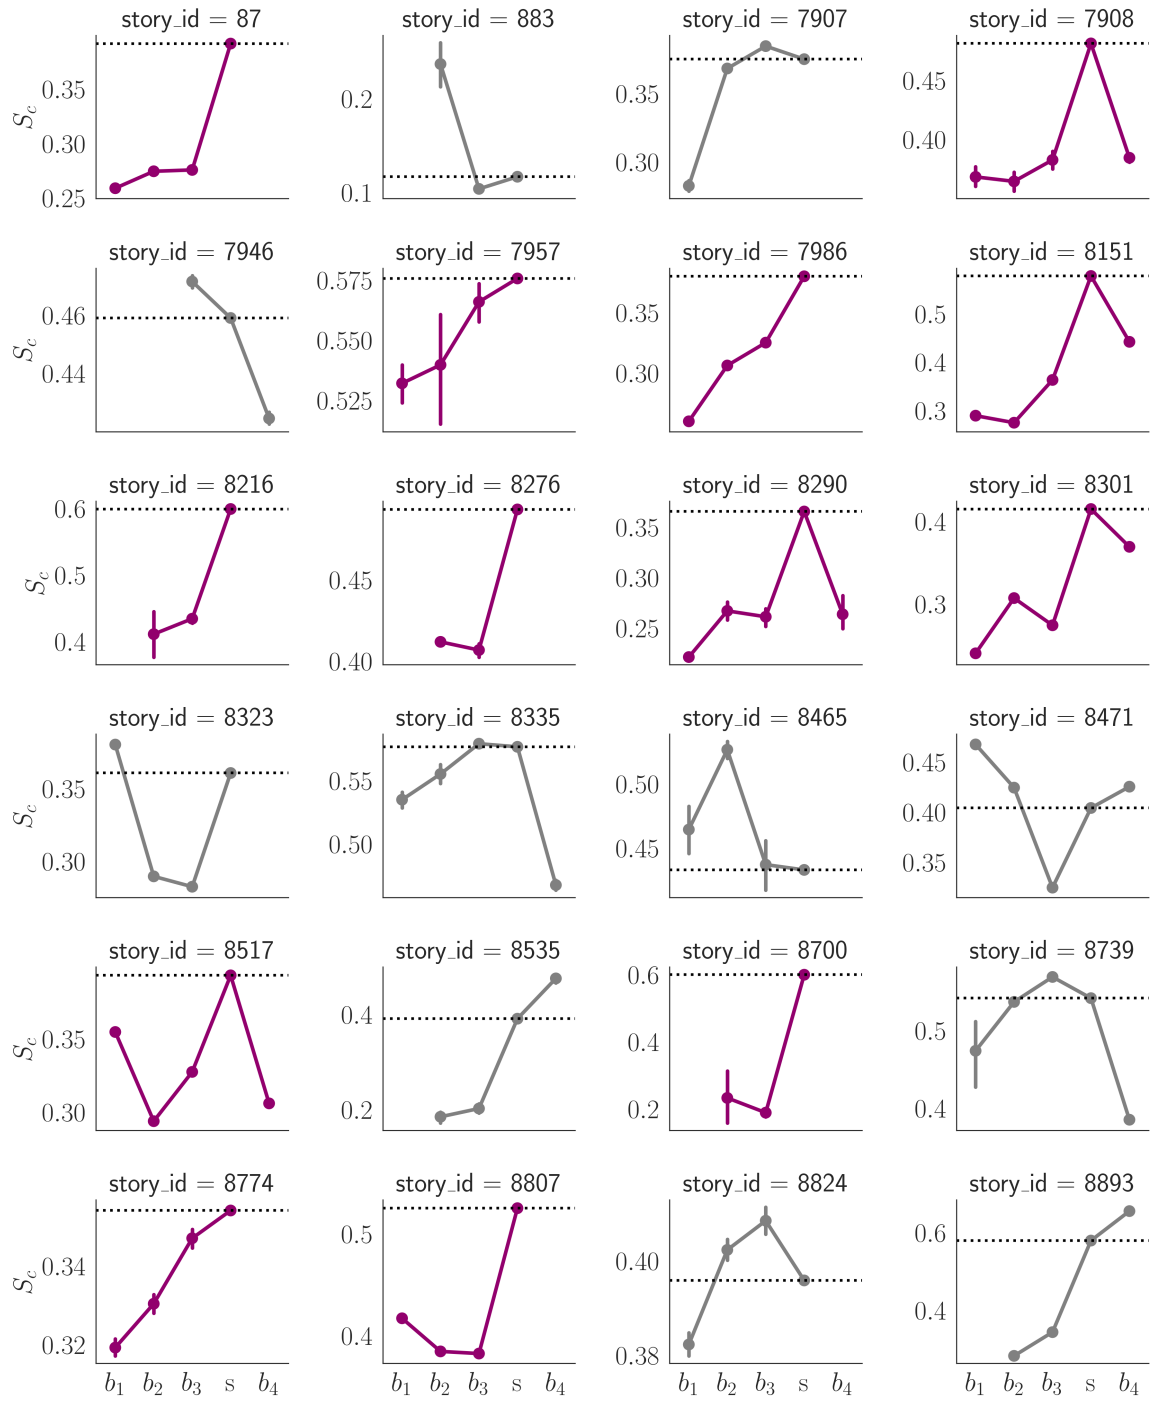

Figure 1: (Continued)

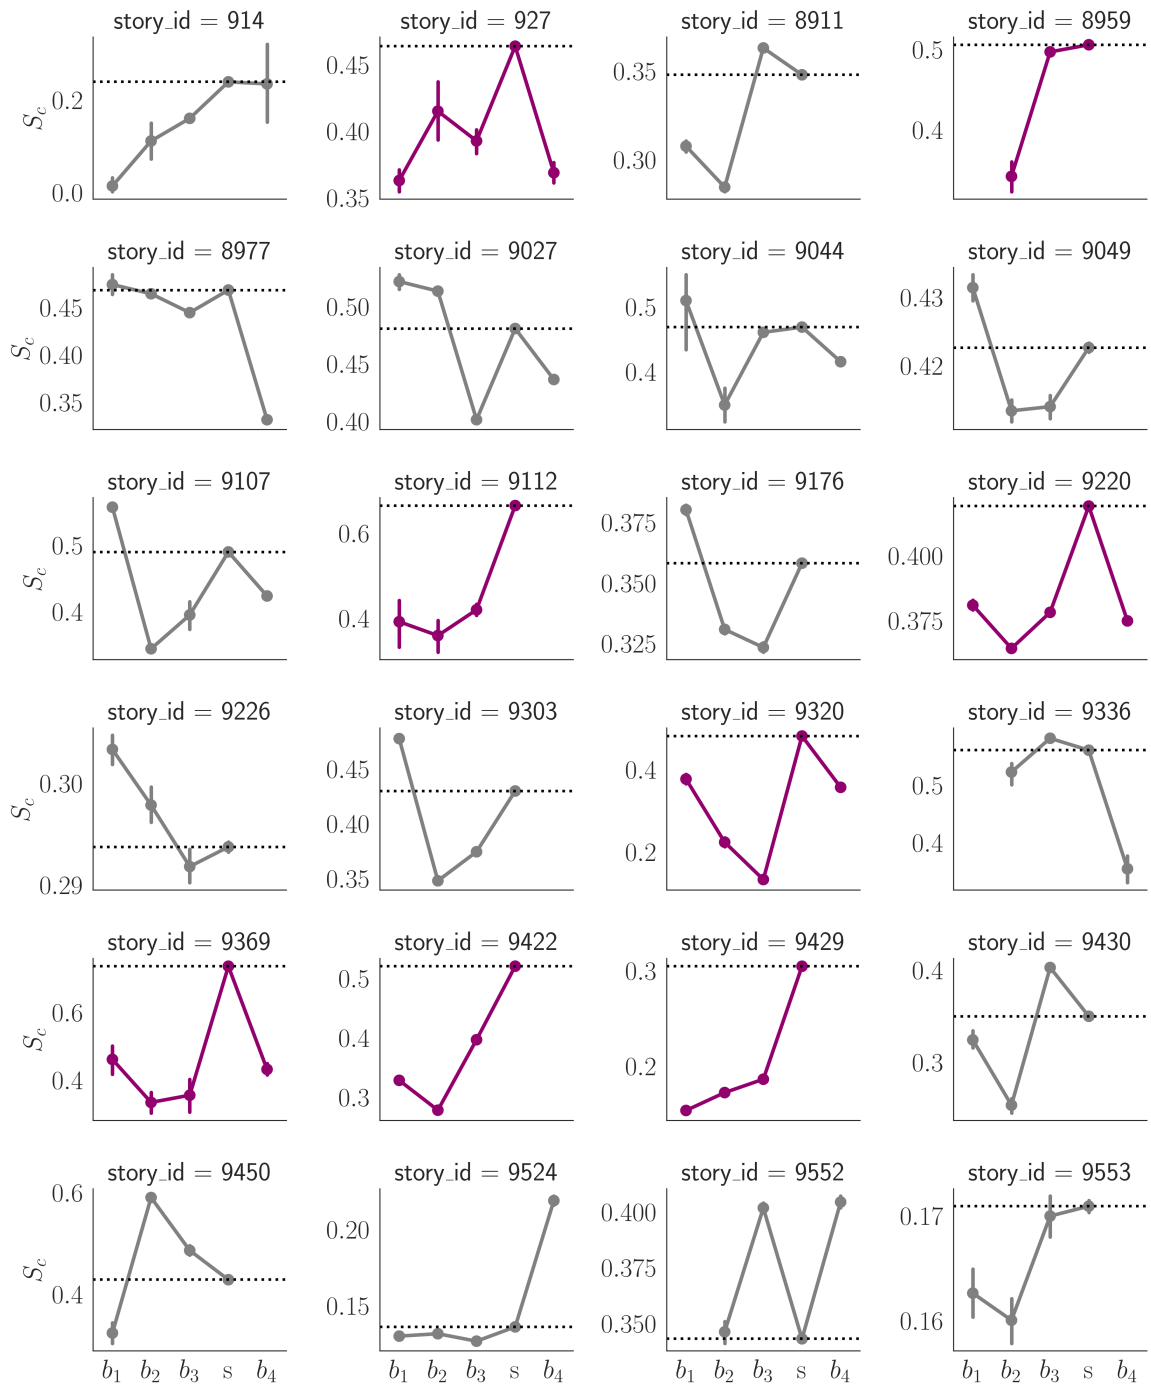

Figure 1: (Continued)

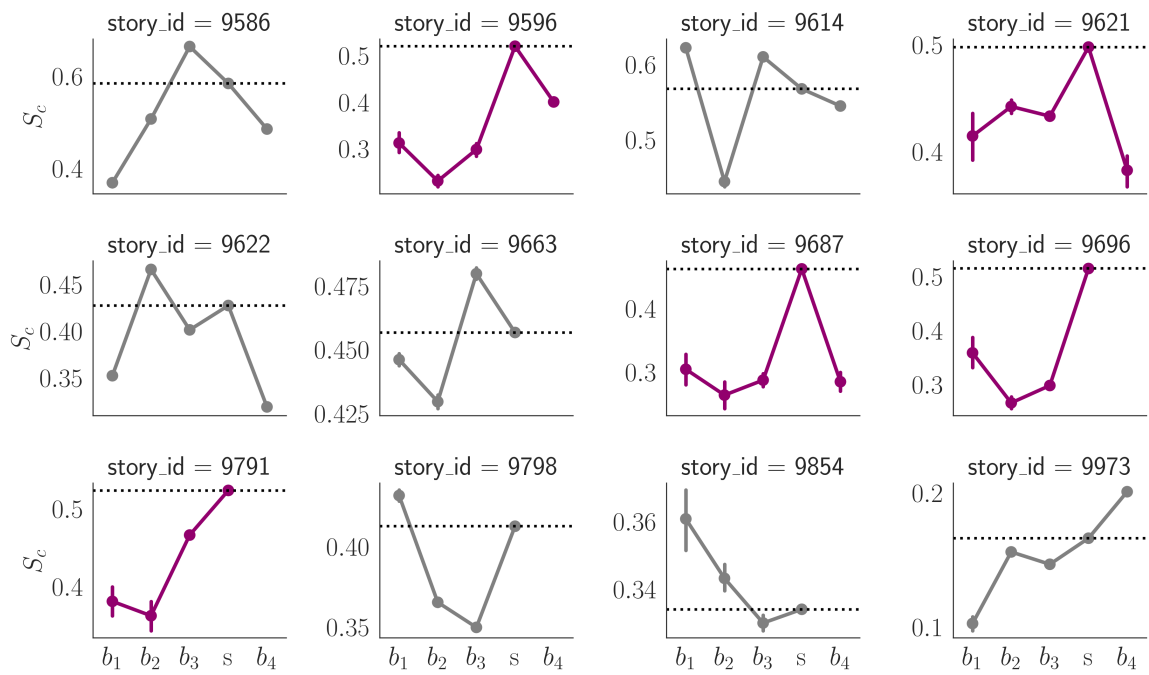

Figure 1: (Continued)
