# Supplementary material for: The adaptive community-response (ACR) method for collecting misinformation on social media
Source: Springer Nature journal article supplement (doi:10.1186/s40537-024-00894-w), 2024-02-24
Supplement: MOESM7 [file 26789060]

# Additional file 7

## The adaptive community-response (ACR) method for collecting misinformation on social media

Julian Kauk<sup>1</sup>, Helene Kreysa<sup>1</sup>, André Scherag<sup>2, 3</sup>, and Stefan R. Schweinberger<sup>1, 3, 4</sup>

<sup>1</sup>*Department of General Psychology and Cognitive Neuroscience, Friedrich Schiller University Jena, Jena, Germany*

<sup>2</sup>*Institute of Medical Statistics, Computer and Data Sciences, Jena University Hospital, Jena, Germany*

<sup>3</sup>*Michael Stifel Center Jena, Jena, Germany*

<sup>4</sup>*German Center for Mental Health (DZPG), Site Jena-Magdeburg-Halle, Germany*

August 29, 2023

### ROC curves and AUC on story level

The following document provides a multipage figure showing ROC curves and AUC on story level. While tweets during the story period were considered to be positive, tweets during baselines were labeled as negative. Please note that we performed ROC analysis only when at least 100 tweets were available for the baselines. Purple ROC curves indicate AUC equal or greater than .6, implying acceptable classification performance.

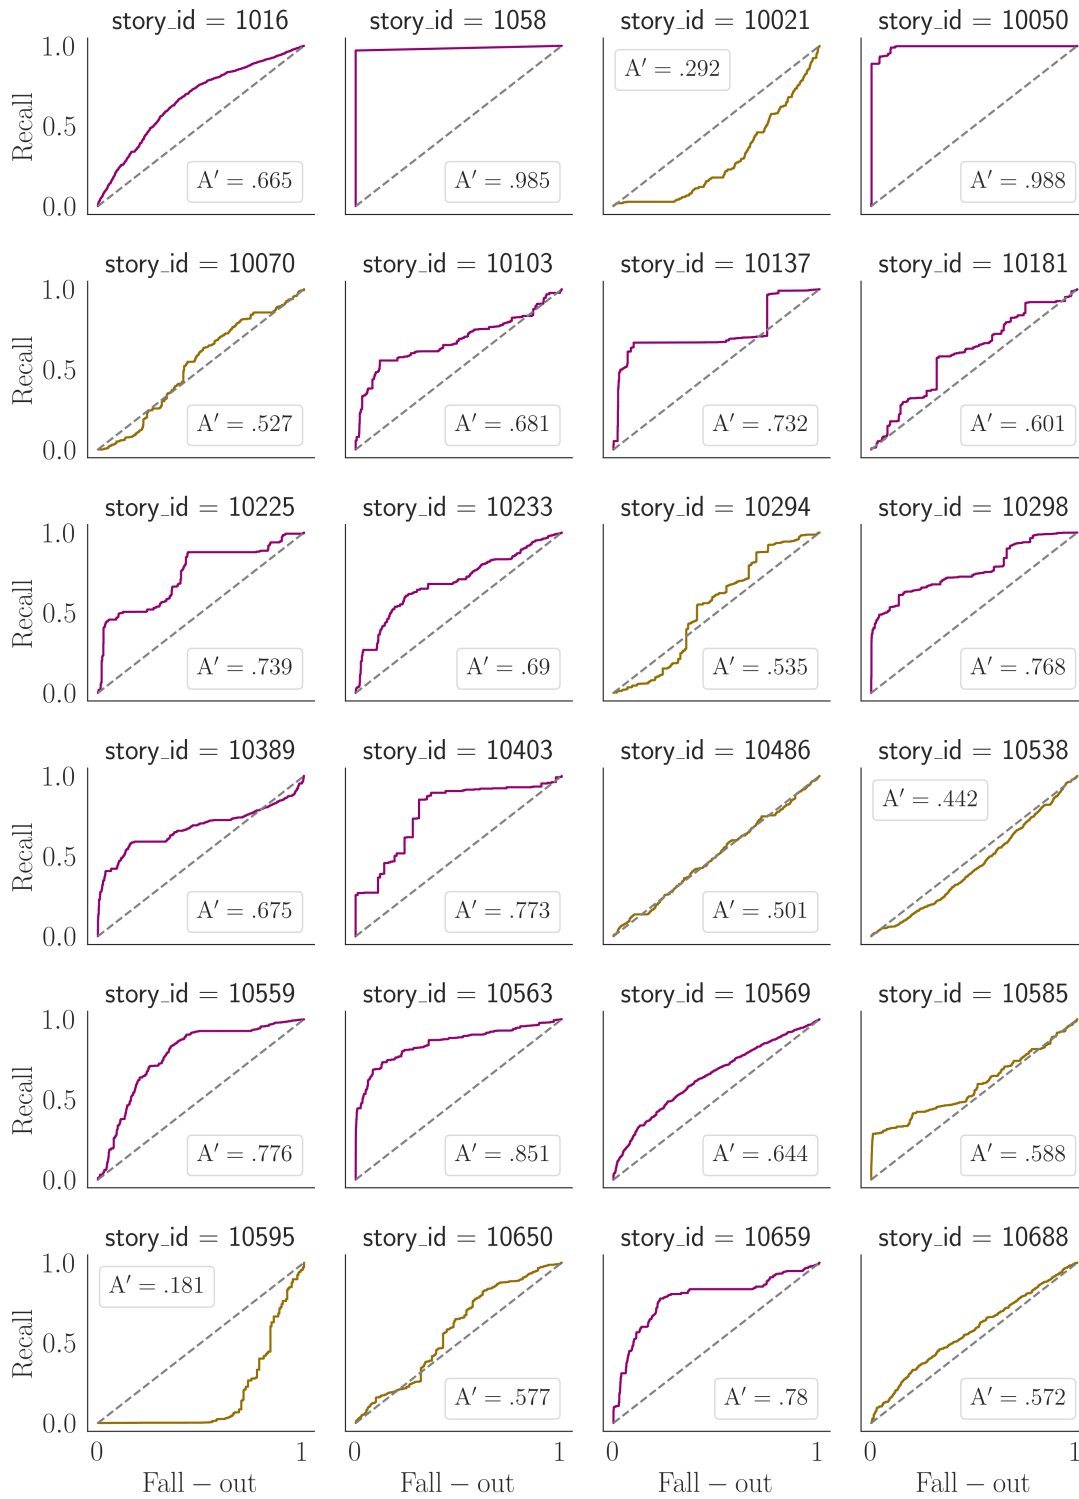

Figure 1: ROC curves and AUC ( $A'$ ) on story level.

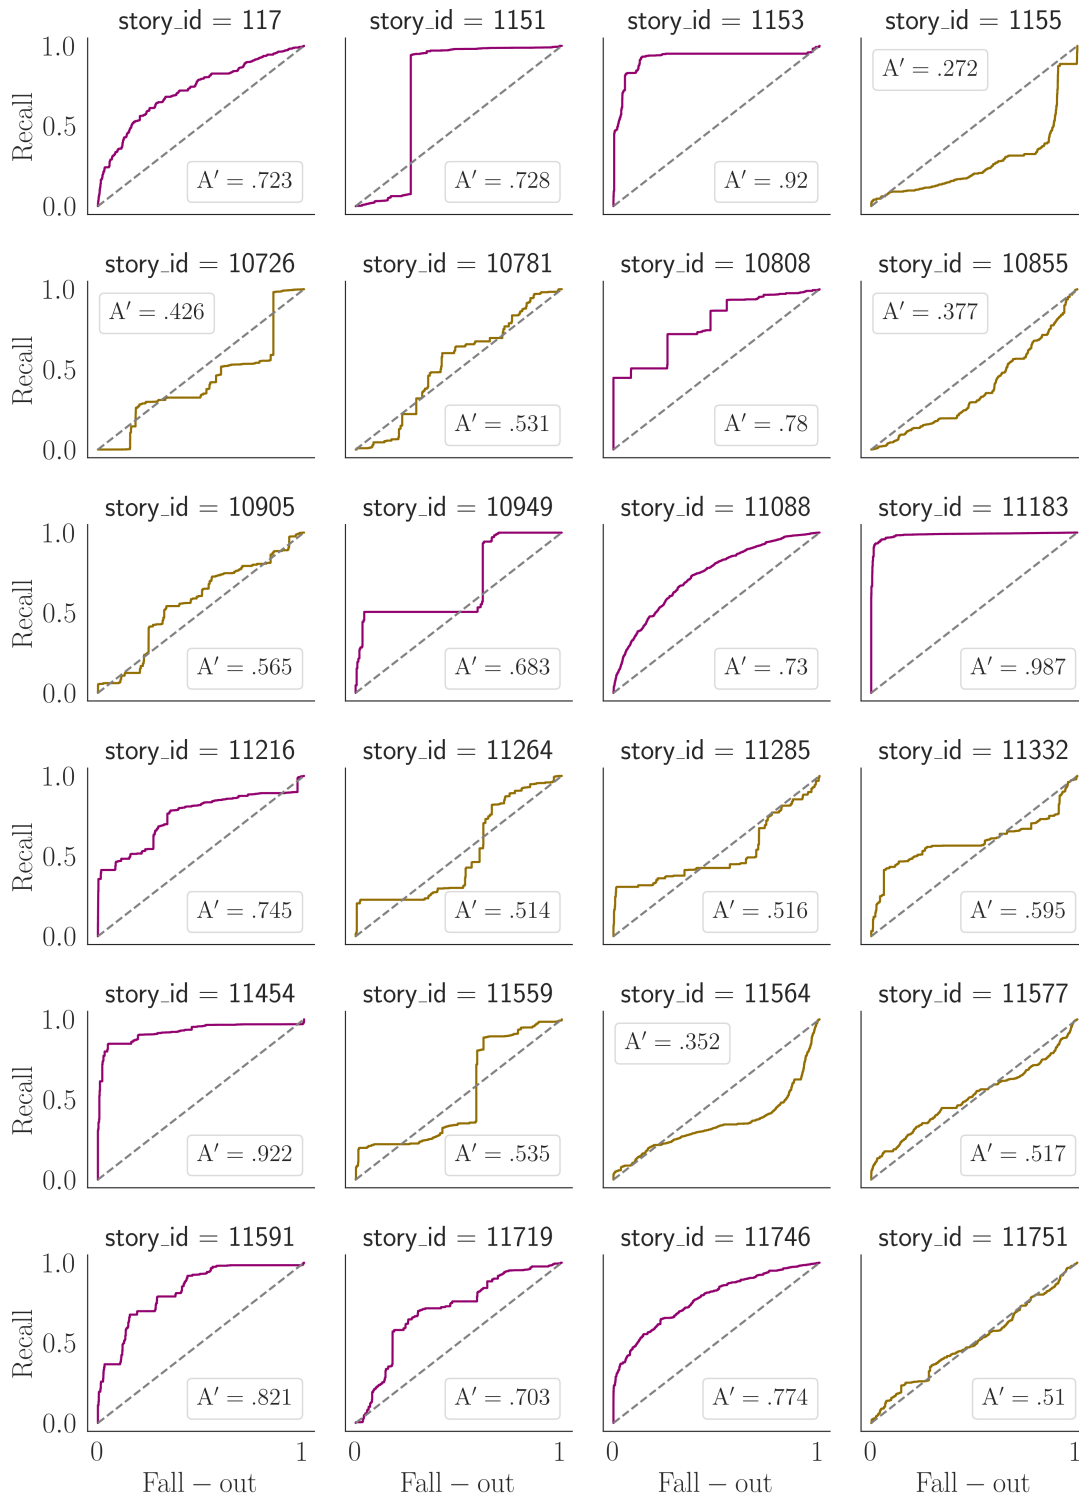

Figure 1: (Continued)

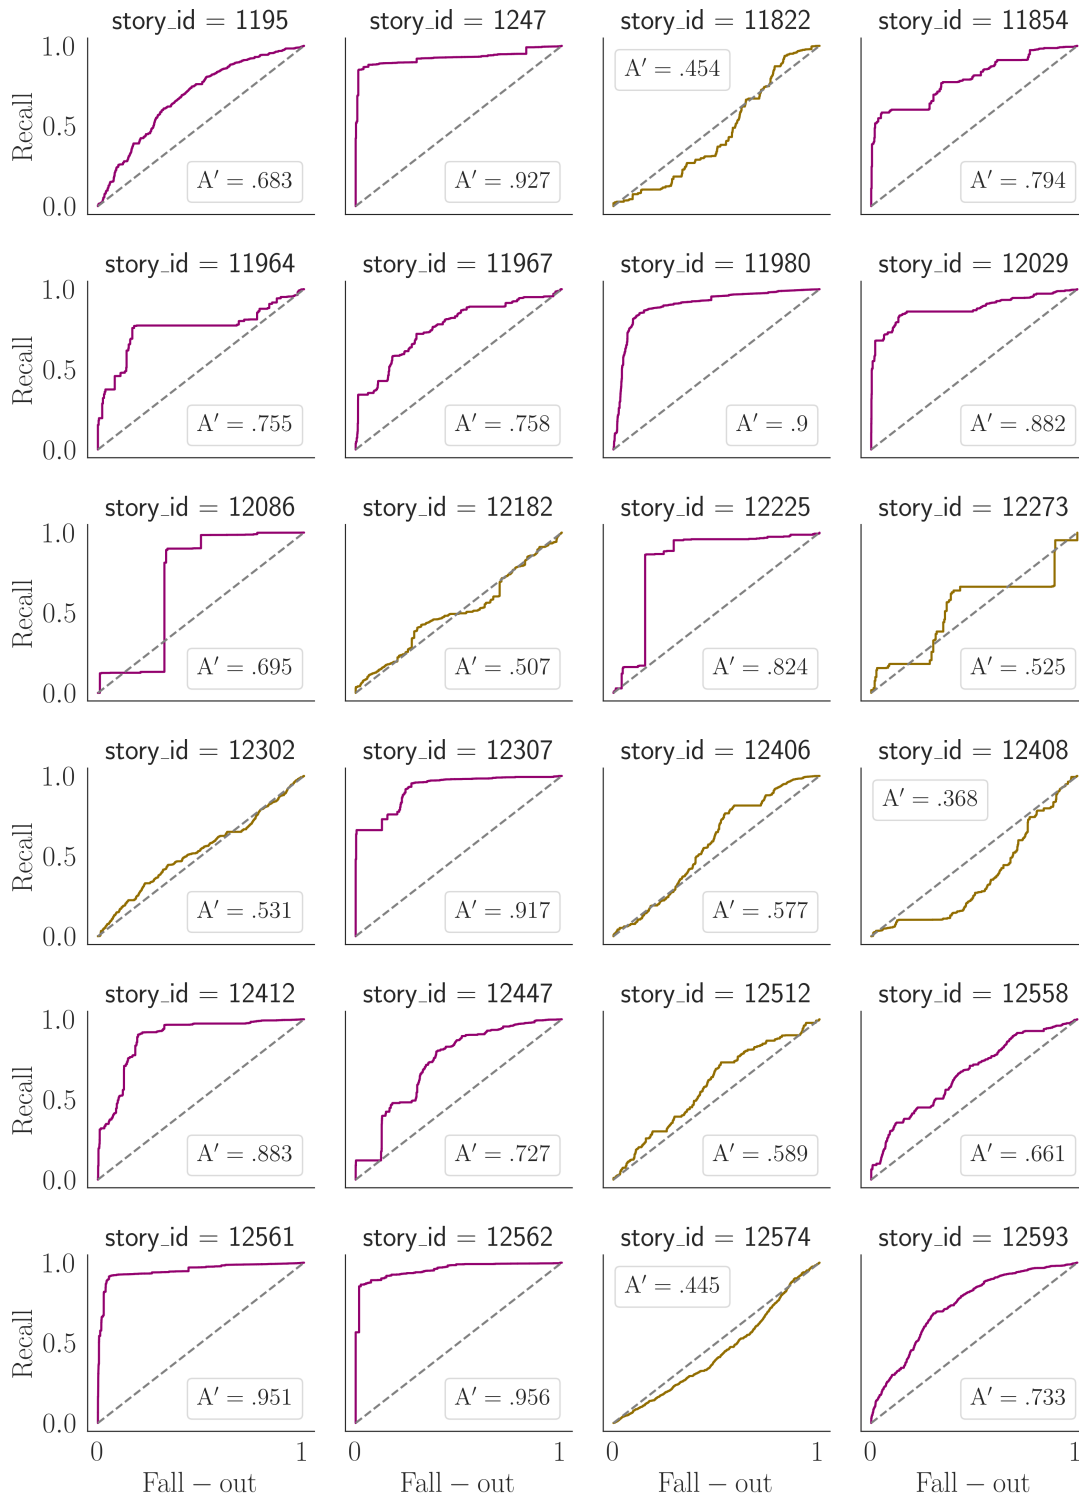

Figure 1: (Continued)

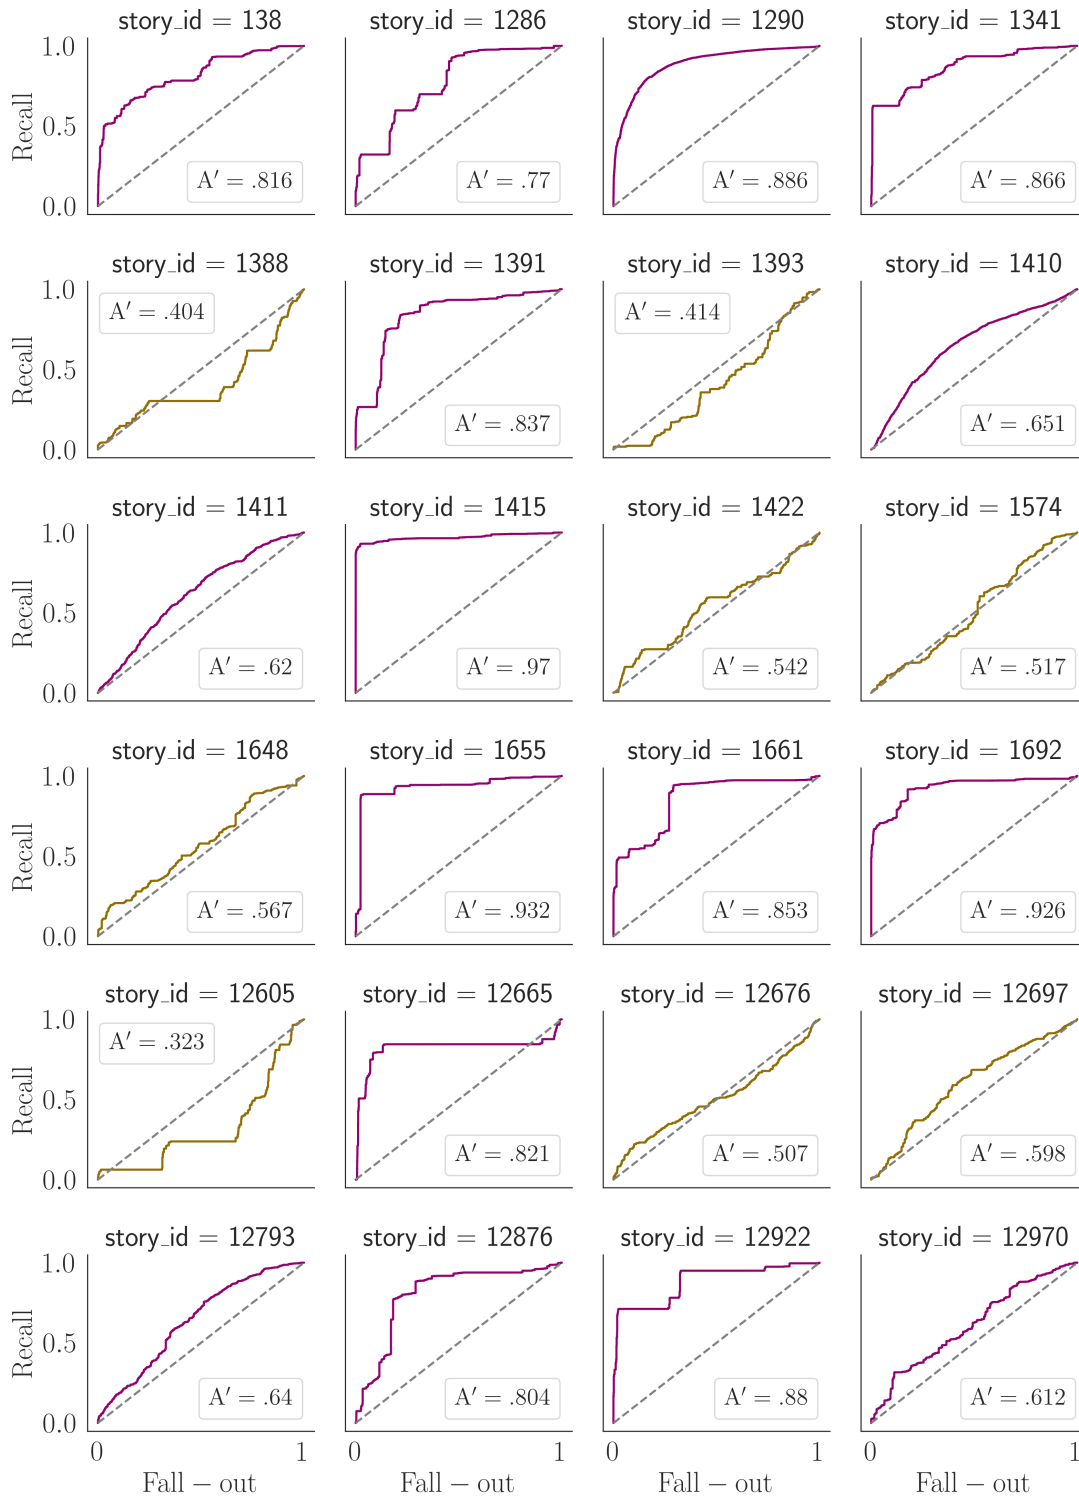

Figure 1: (Continued)

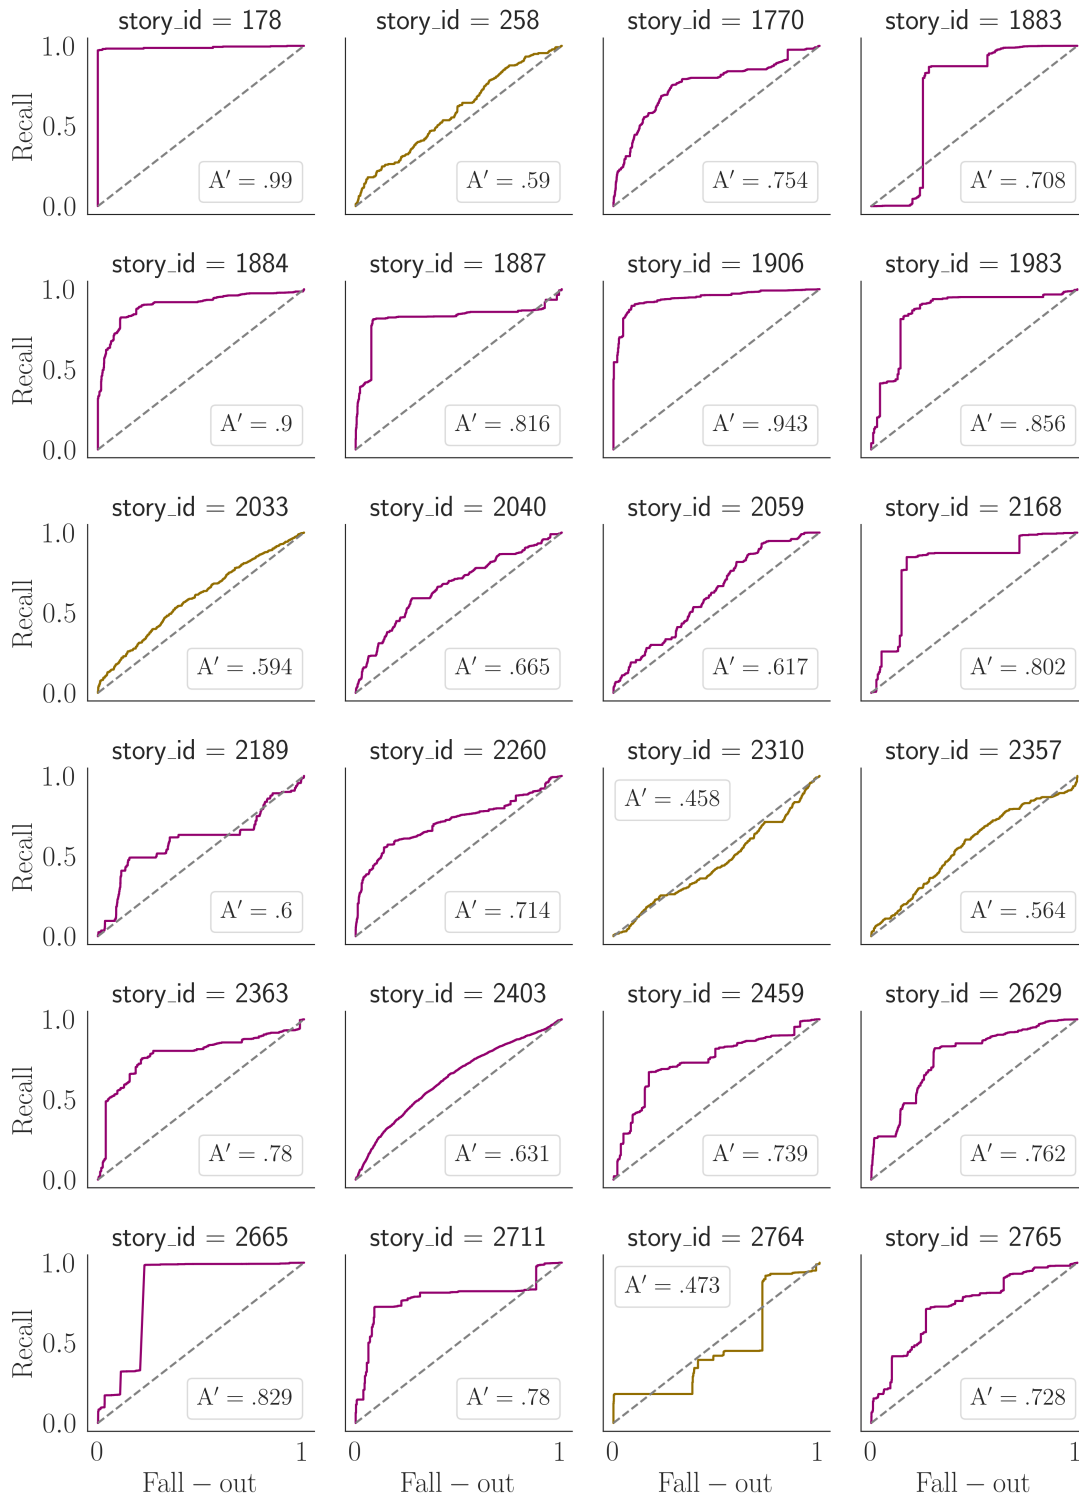

Figure 1: (Continued)

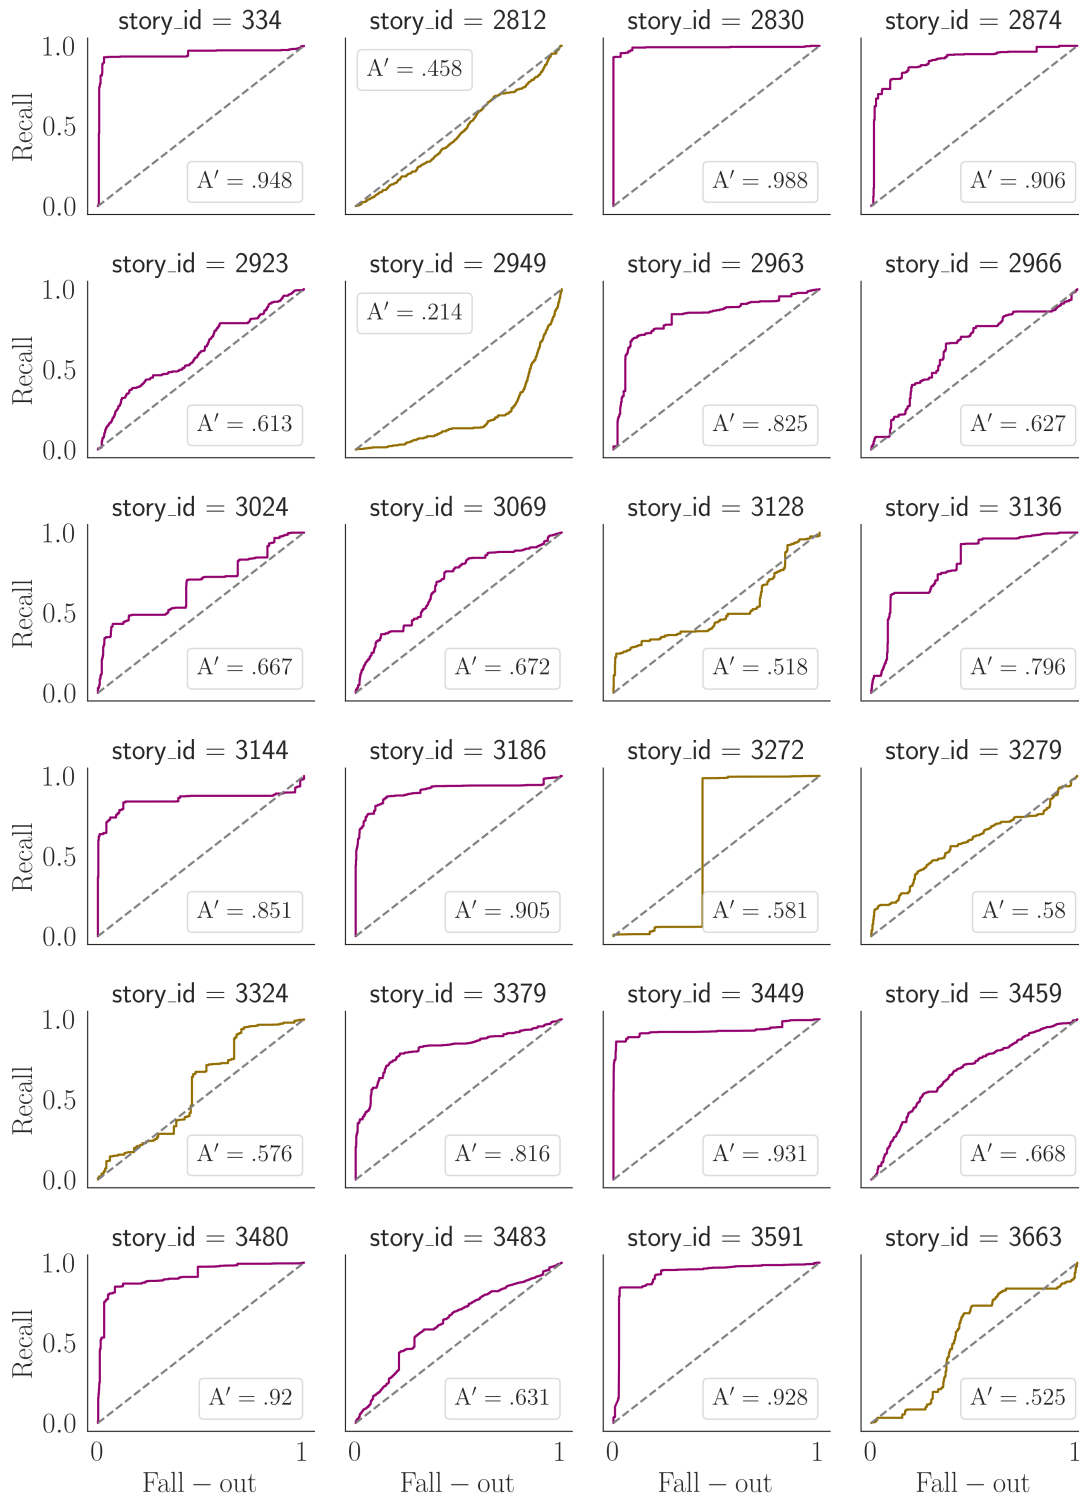

Figure 1: (Continued)

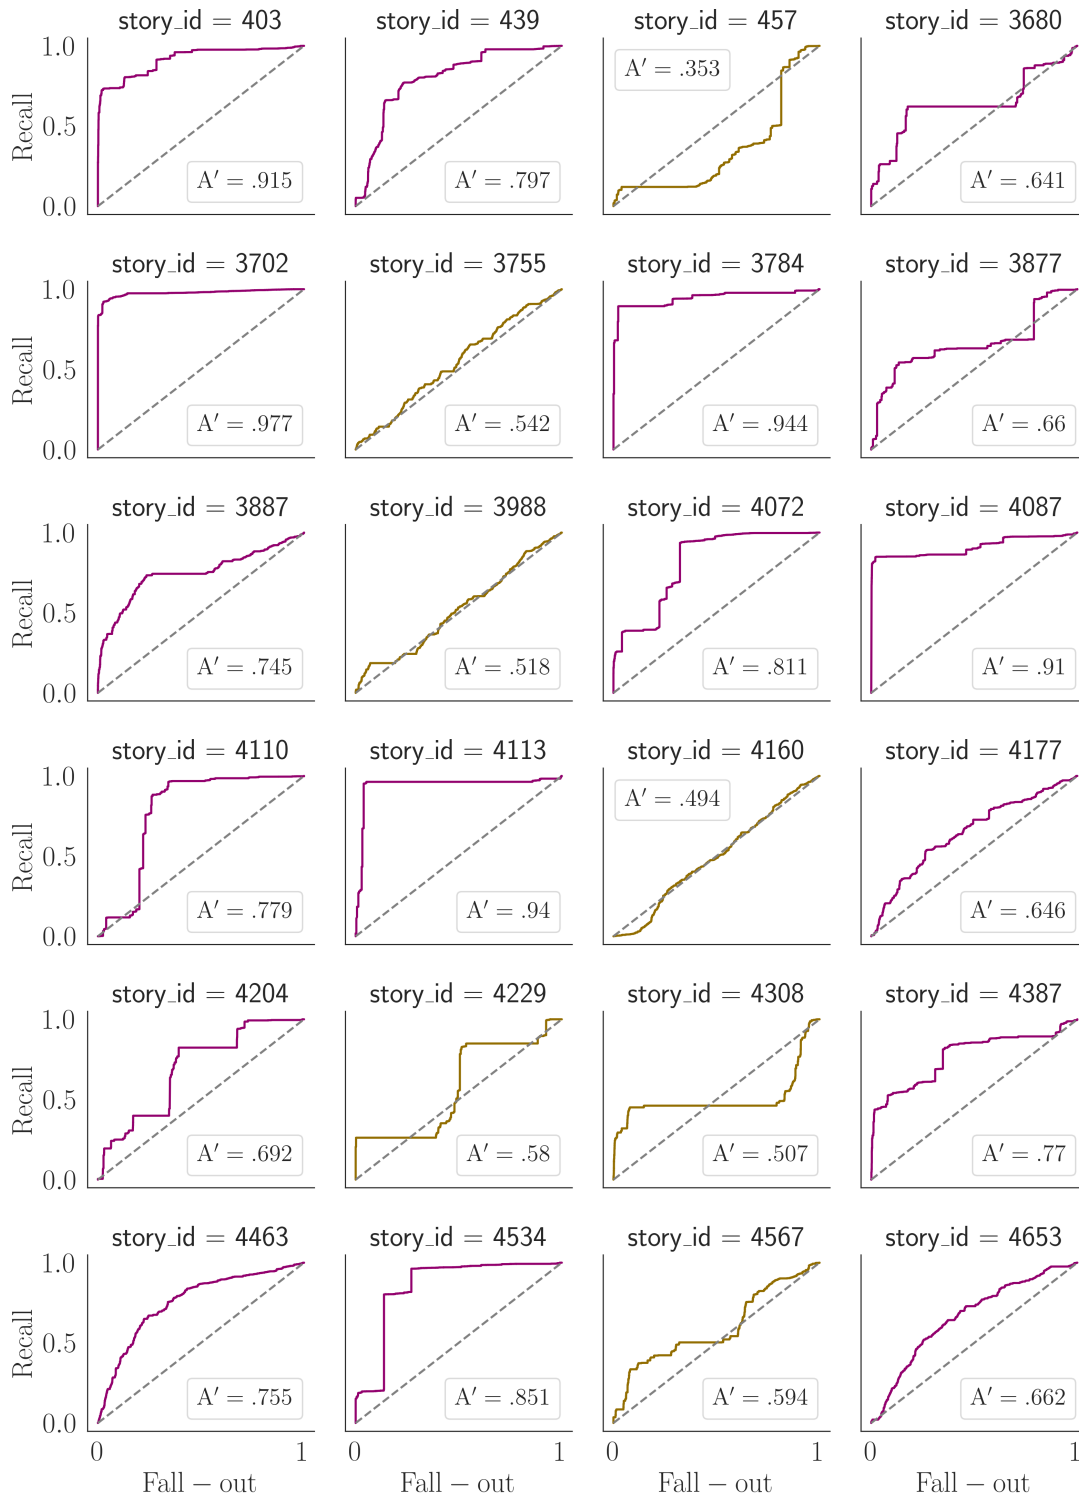

Figure 1: (Continued)



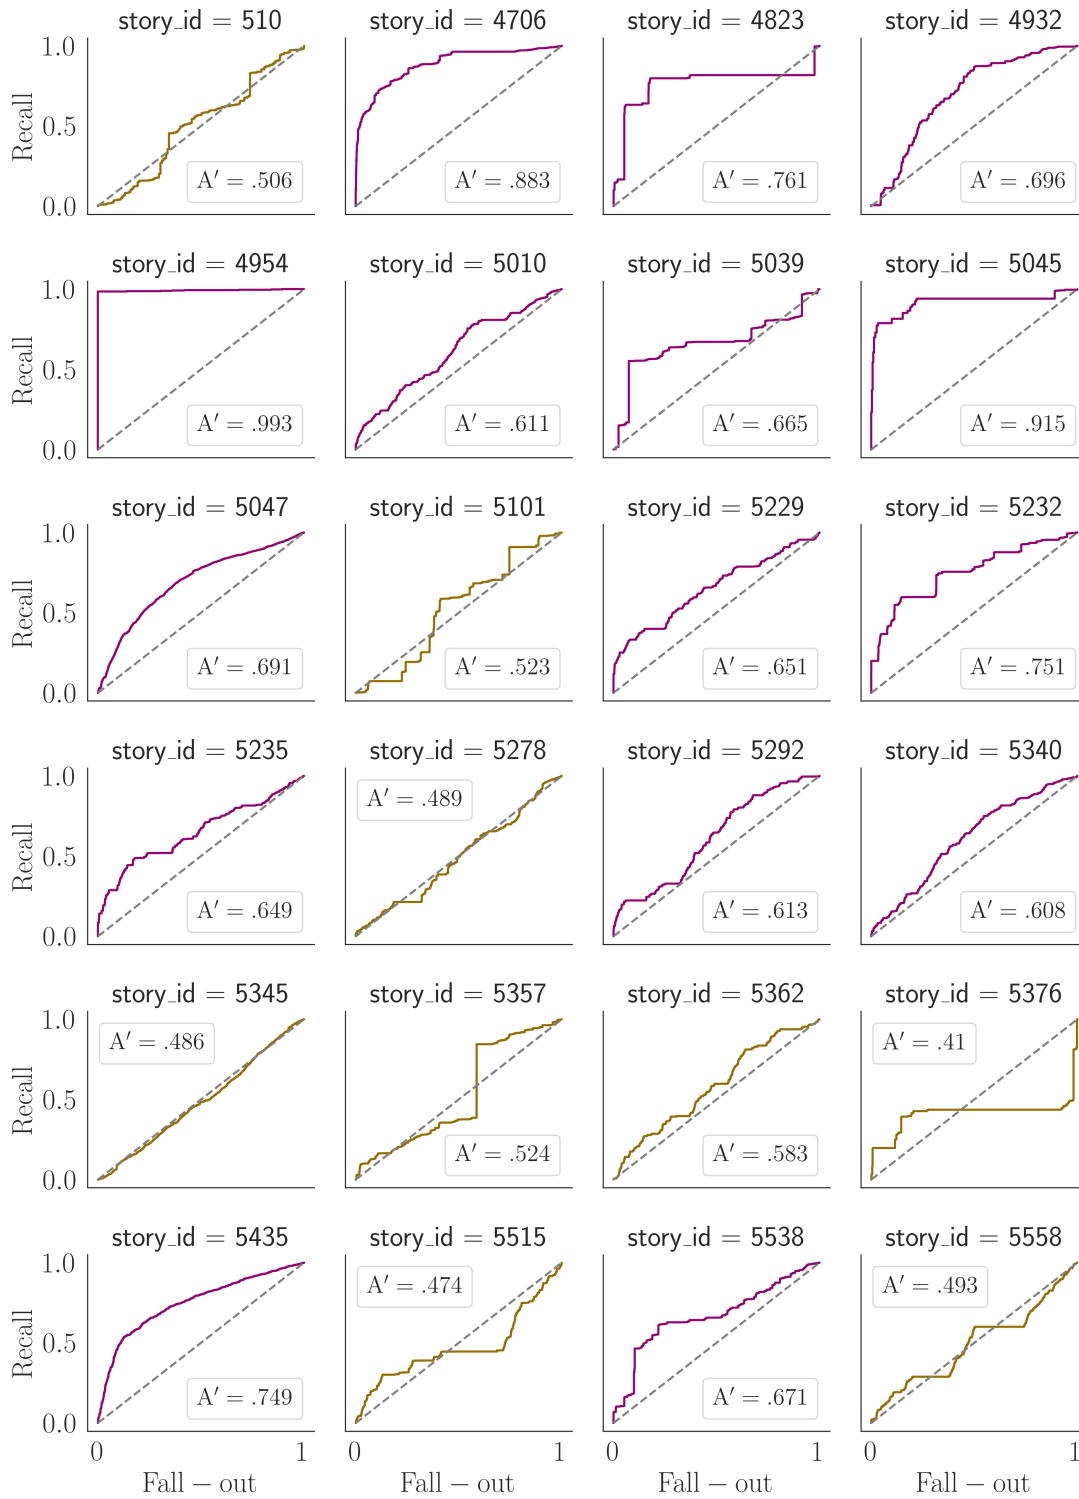

Figure 1: (Continued)

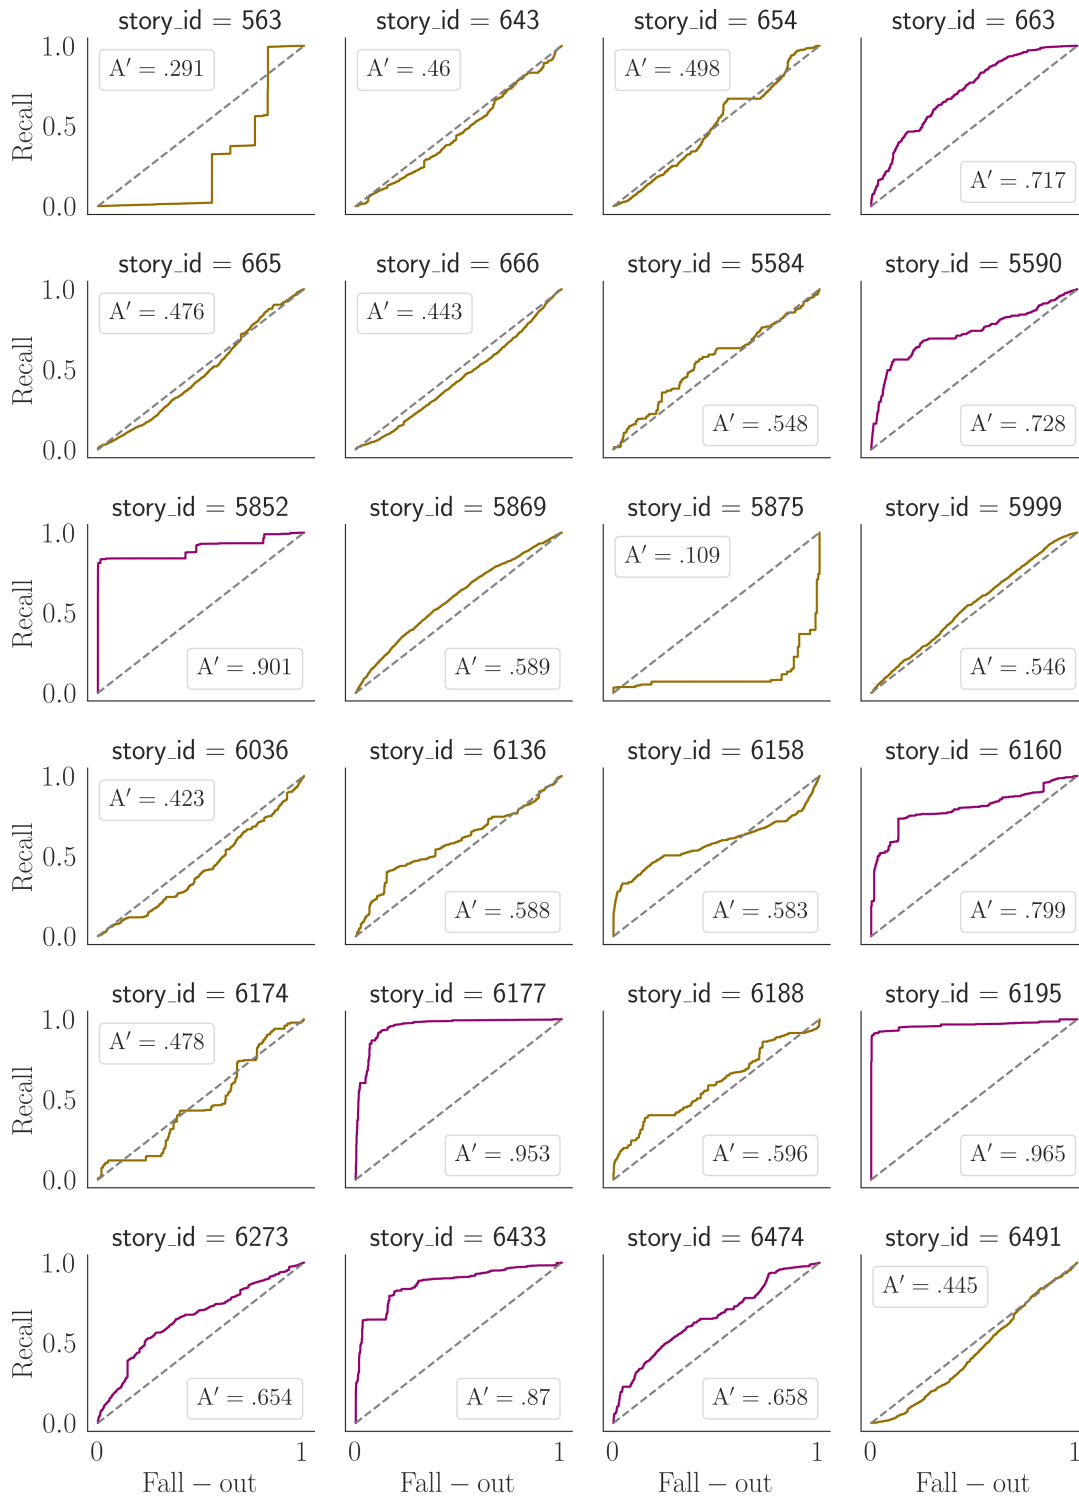

Figure 1: (Continued)

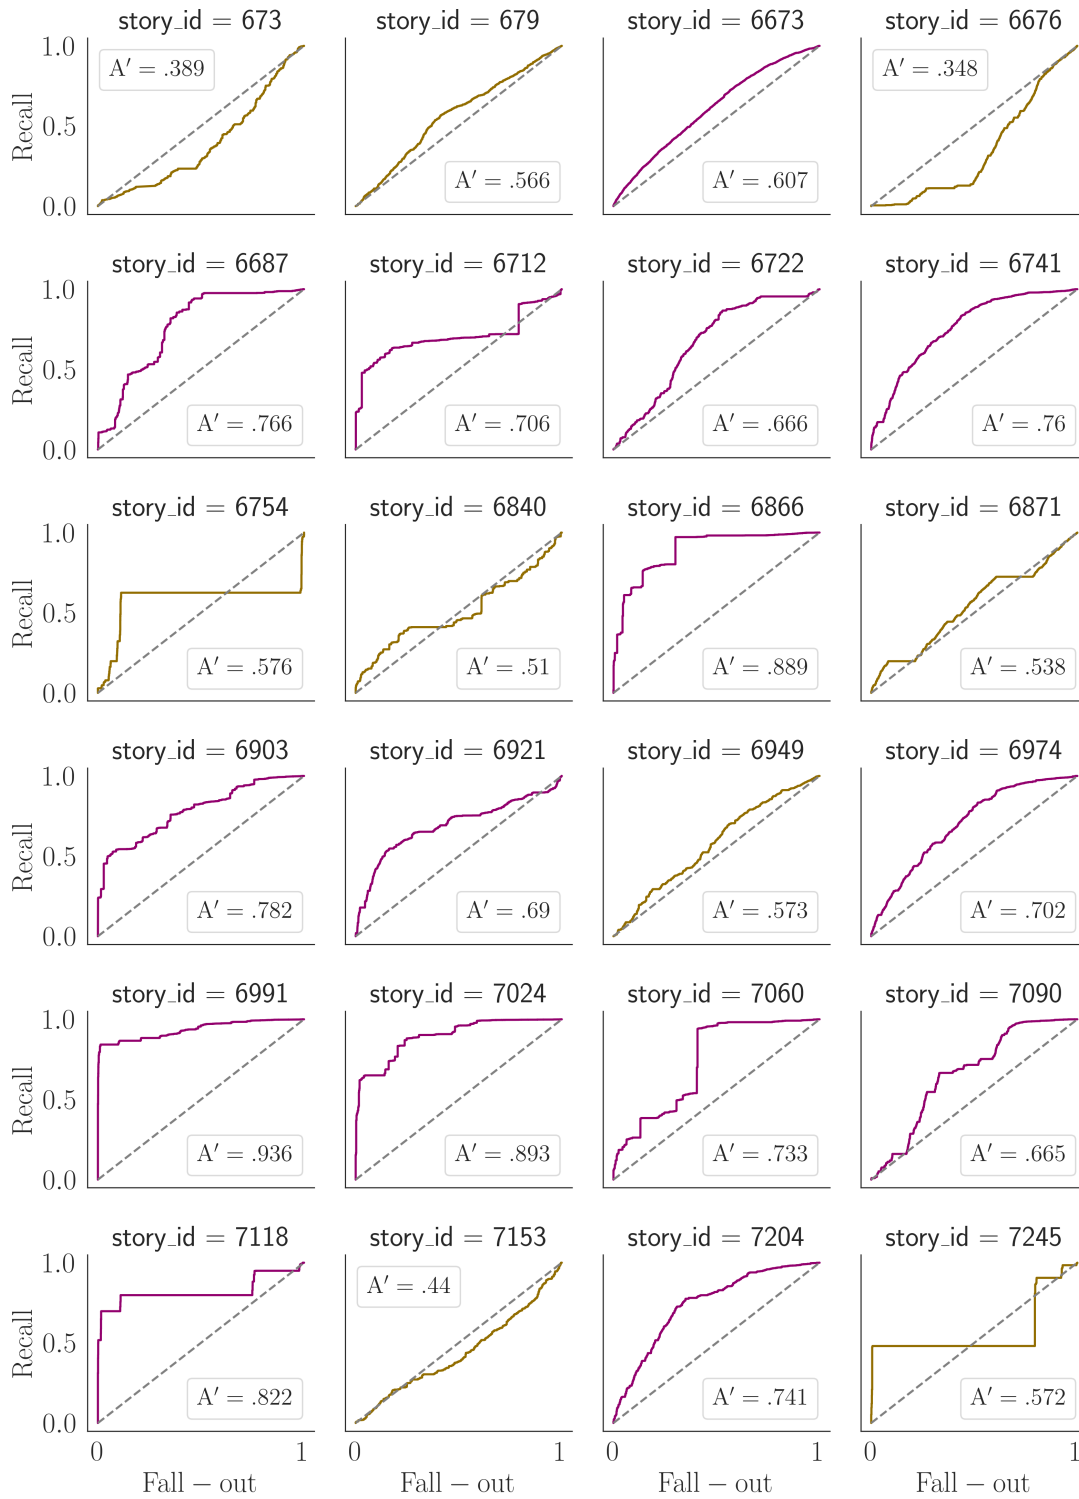

Figure 1: (Continued)

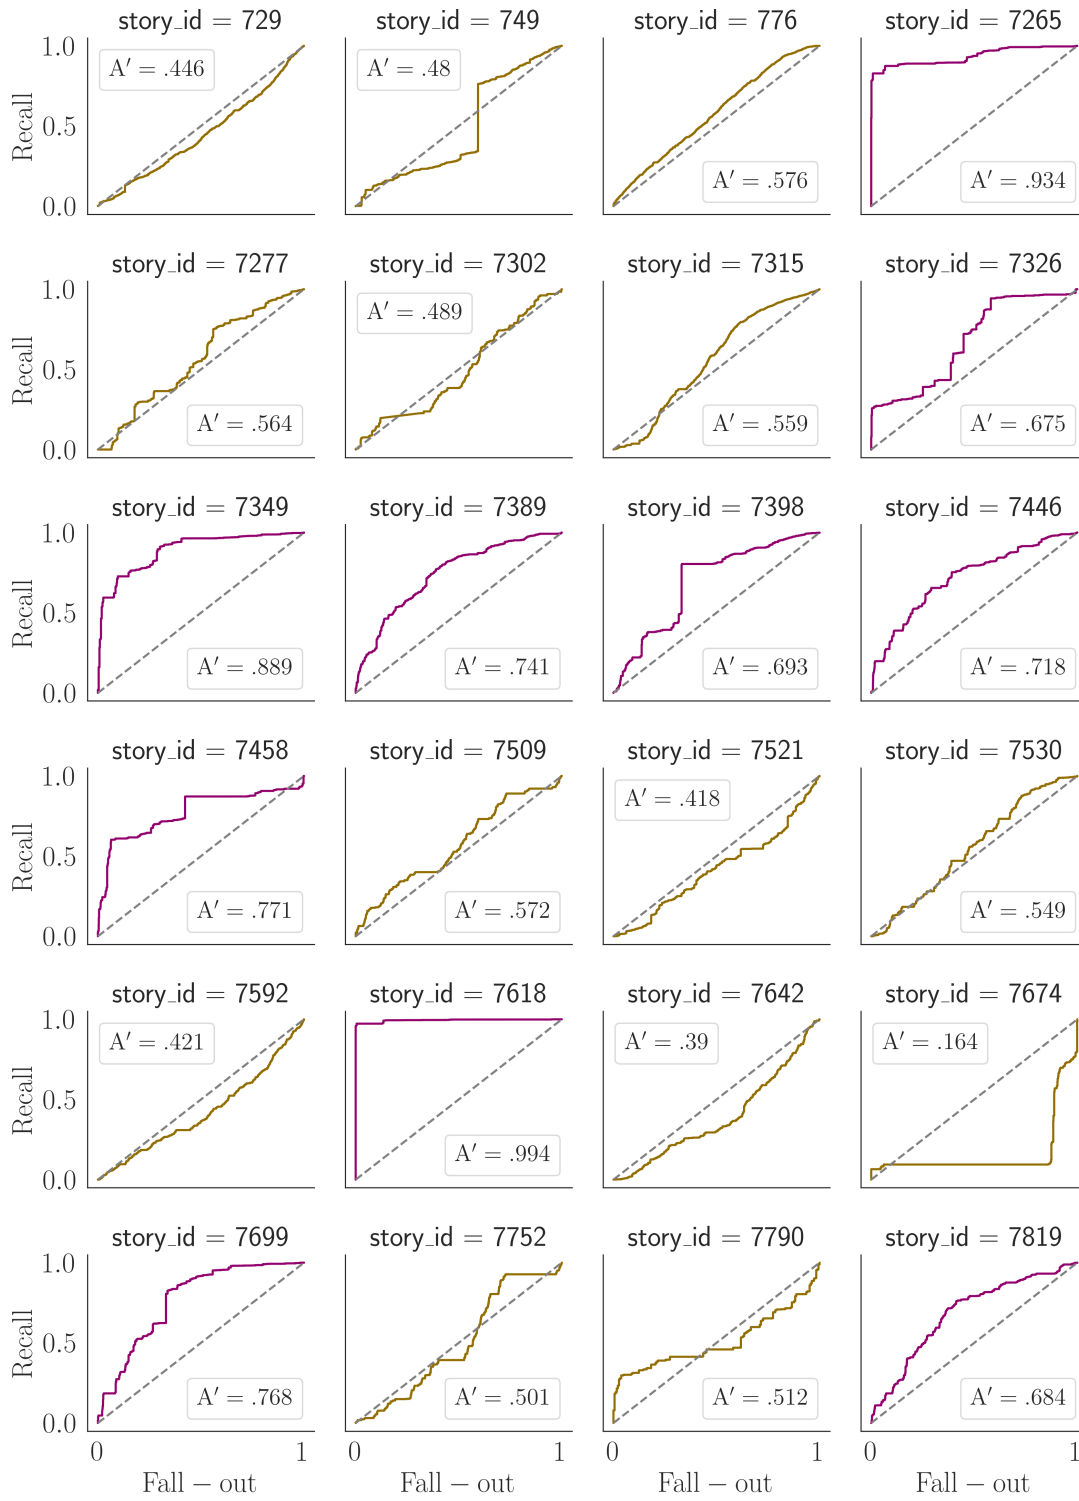

Figure 1: (Continued)

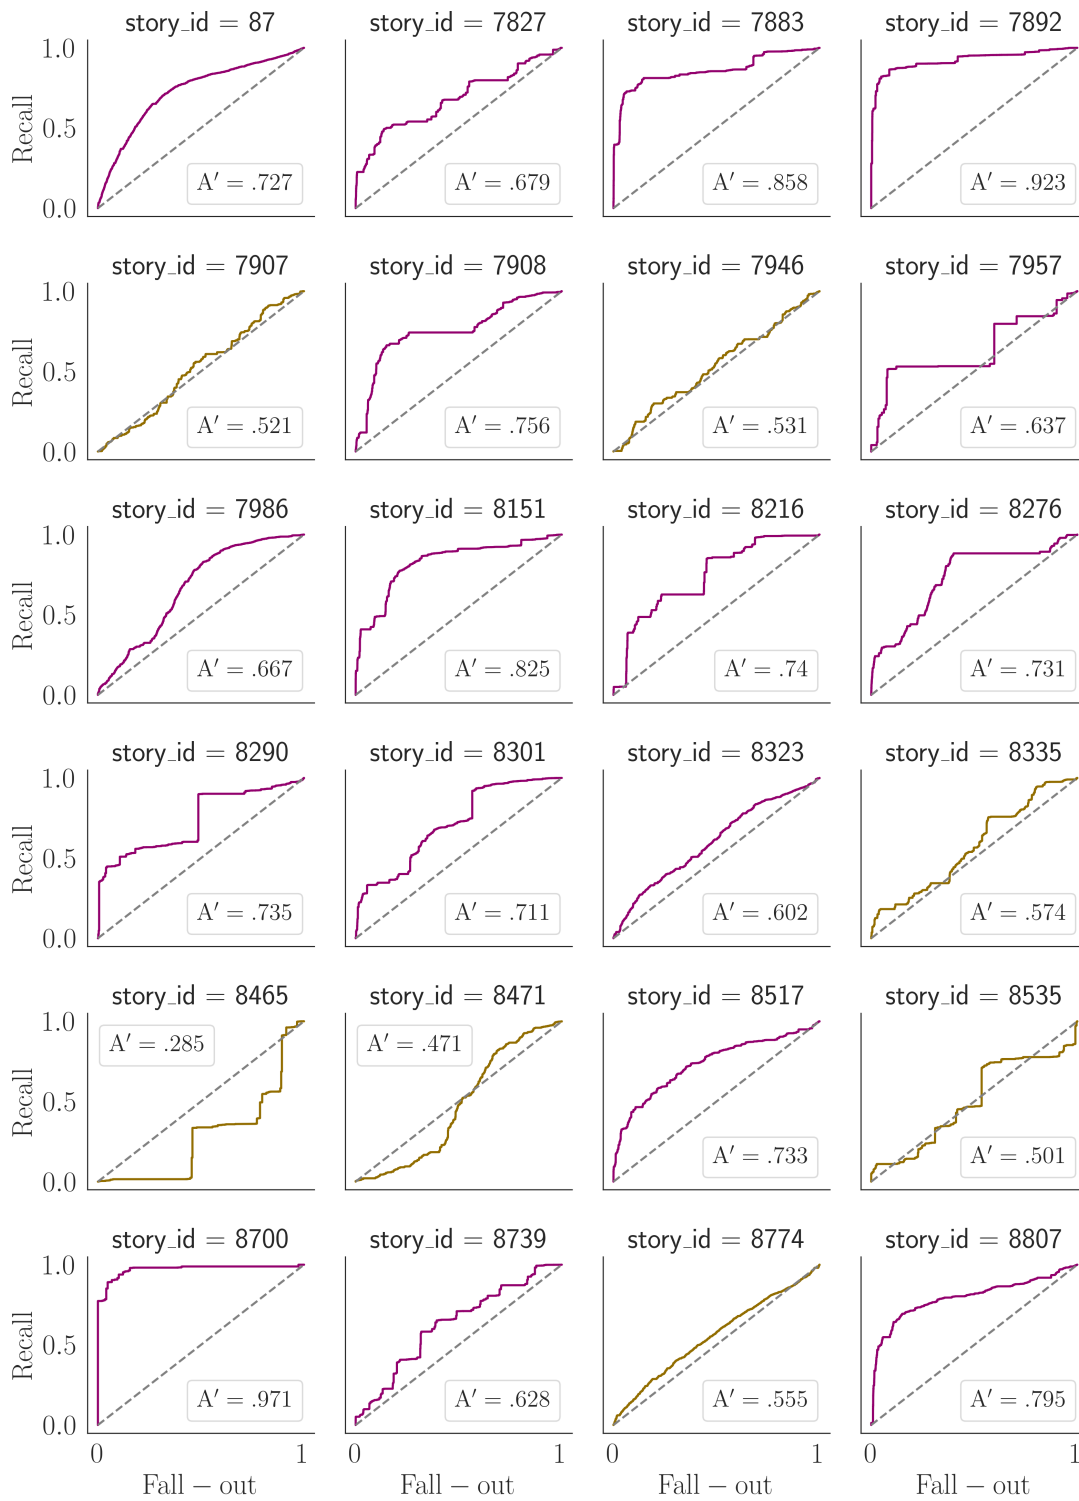

Figure 1: (Continued)

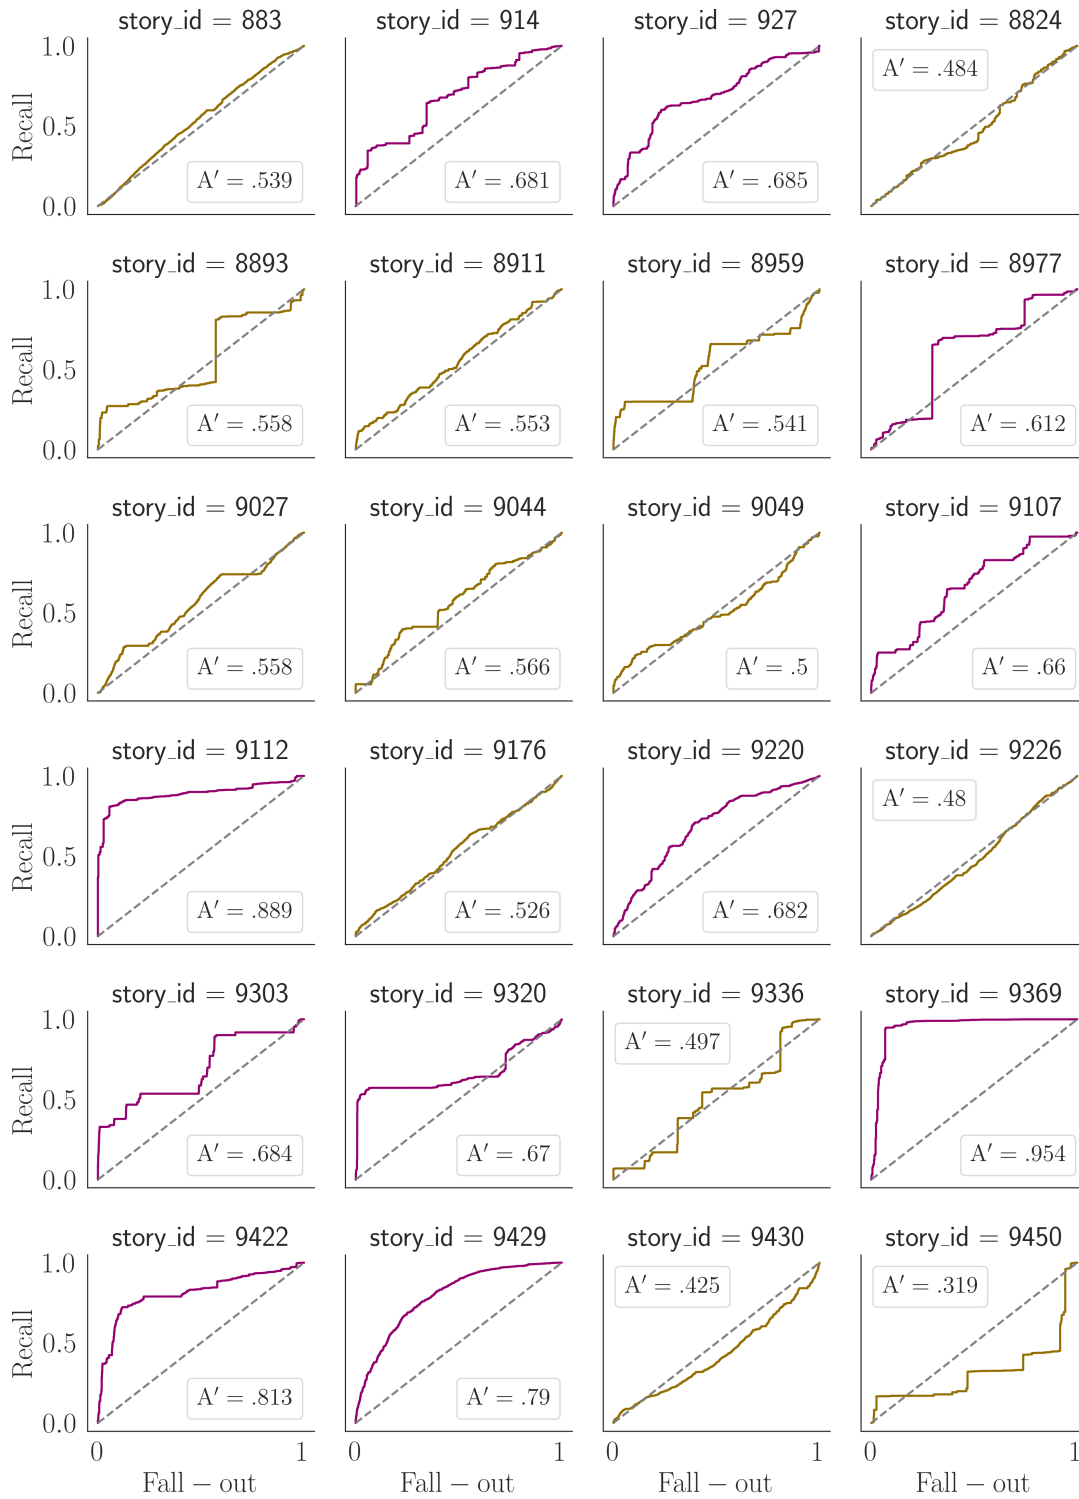

Figure 1: (Continued)

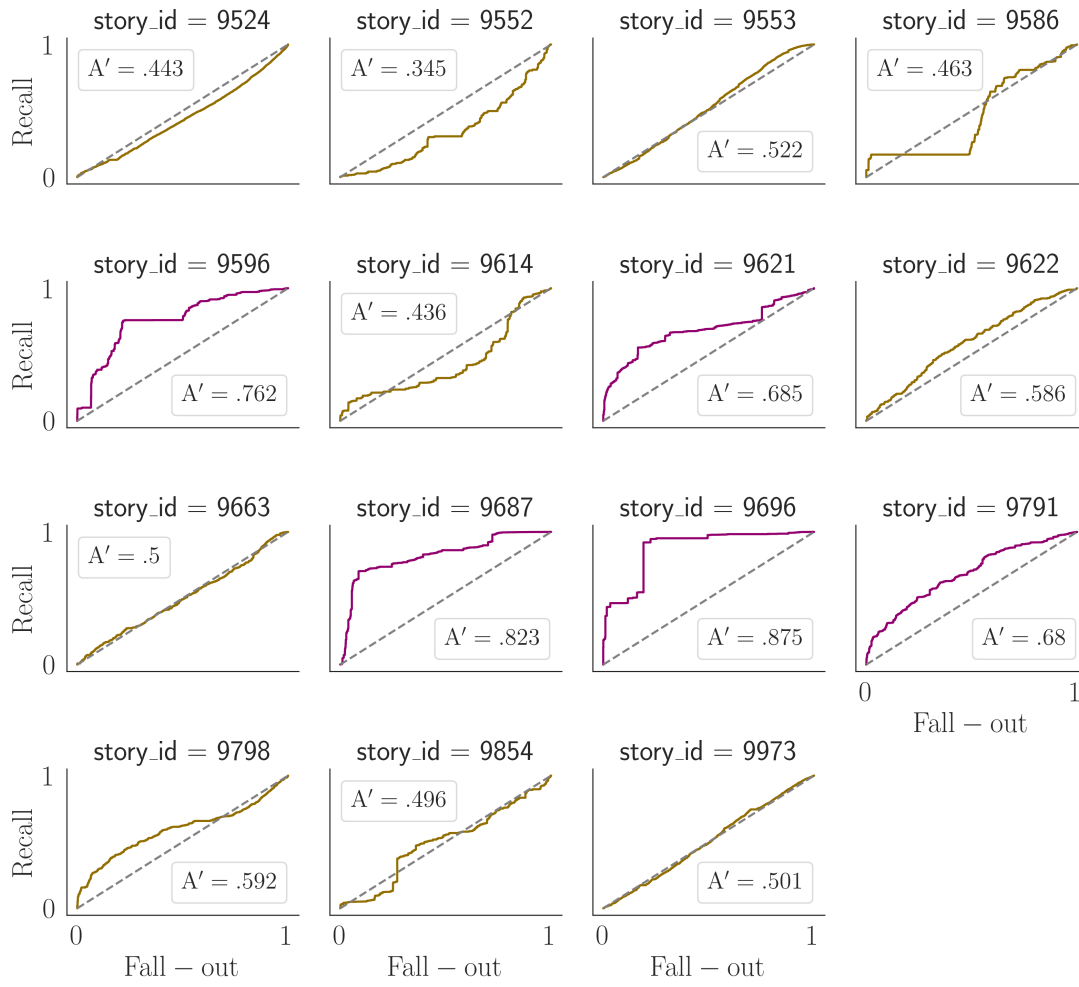

Figure 1: (Continued)
